# Supplementary material for: Comparative study of genome-wide plant biomass-degrading CAZymes in white rot, brown rot and soft rot fungi
Source: PubMed Central journal article supplement (PMC6059041; doi:10.1080/21501203.2017.1419296), 2017-12-24
Supplement: TMYC_A_1419296_SM6664.pdf [file TMYC_A_1419296_SM6664.pdf]

## Comparative Study of Genome-Wide Plant Biomass Degrading CAZymes in White Rot, Brown Rot and Soft Rot Fungi

Ayyappa Kumar Sista Kameshwar, Wensheng Qin\*

Department of Biology, Lakehead University, 955 Oliver Road, Thunder Bay, Ontario, P7B 5E1, Canada.

Wensheng Qin \* Email: [wqin@lakeheadu.ca](mailto:wqin@lakeheadu.ca), Tel: 807-343-8467

| <b>Soft rot fungi</b>            | <b>T.re</b>  | <b>R.or</b> | <b>A.we</b>  | <b>P.ch</b> | <b>D.es</b> | <b>Hypo</b>  | <b>A.ni</b> | <b>Hy.EC38</b> | <b>N.cr</b> | <b>Hy.CO27</b> | <b>F.ox</b> | <b>Lecy</b> | <b>B.do</b> |             |             |
|----------------------------------|--------------|-------------|--------------|-------------|-------------|--------------|-------------|----------------|-------------|----------------|-------------|-------------|-------------|-------------|-------------|
| Cellular processes and signaling | 1940         | 3137        | 2053         | 2147        | 2051        | 2103         | 2067        | 2122           | 2535        | 2119           | 4387        | 1502        | 2553        |             |             |
| Information, storage, processing | 1406         | 2221        | 1367         | 1473        | 1474        | 1514         | 1335        | 1508           | 1939        | 1509           | 2871        | 1112        | 1734        |             |             |
| Metabolism                       | 2074         | 2475        | 2894         | 2706        | 2386        | 2466         | 2906        | 2589           | 2156        | 2607           | 5216        | 1986        | 3228        |             |             |
| Poorly Characterized             | 1413         | 2439        | 1825         | 1929        | 1623        | 1710         | 1832        | 1741           | 1581        | 1759           | 3381        | 1353        | 2056        |             |             |
| <b>White rot Fungi</b>           | <b>P.chr</b> | <b>P.ca</b> | <b>C.sub</b> | <b>H.an</b> | <b>F.me</b> | <b>P.cin</b> | <b>D.sq</b> | <b>T.ve</b>    | <b>P.st</b> | <b>P.br</b>    | <b>B.ci</b> | <b>P.os</b> | <b>S.hi</b> | <b>P.er</b> |             |
| Cellular processes and signaling | 2423         | 2284        | 2300         | 2347        | 2291        | 2227         | 2318        | 2576           | 2406        | 2855           | 2335        | 2314        | 2868        | 2654        |             |
| Information, storage, processing | 1713         | 1539        | 1482         | 1641        | 1457        | 1553         | 1575        | 1725           | 1504        | 1871           | 1615        | 1570        | 1791        | 1701        |             |
| Metabolism                       | 2179         | 2401        | 2111         | 2001        | 2010        | 1944         | 2218        | 2364           | 2091        | 2765           | 2367        | 2094        | 2664        | 2159        |             |
| Poorly Characterized             | 1567         | 1601        | 1435         | 1643        | 1501        | 1610         | 1567        | 1599           | 1568        | 1792           | 1658        | 1496        | 1715        | 1567        |             |
| <b>Brown rot Fungi</b>           | <b>P.pl</b>  | <b>F.ra</b> | <b>W.co</b>  | <b>D.pr</b> | <b>D.qu</b> | <b>L.su</b>  | <b>P.pl</b> | <b>N.le</b>    | <b>S.la</b> | <b>C.co</b>    | <b>G.tr</b> | <b>F.he</b> | <b>F.pi</b> | <b>H.pi</b> | <b>C.pu</b> |
| Cellular processes and signaling | 1590         | 1976        | 2330         | 2048        | 2244        | 2264         | 2426        | 2262           | 2083        | 2501           | 2202        | 2147        | 2421        | 2456        | 2455        |
| Information, storage, processing | 1035         | 1329        | 1649         | 1353        | 1598        | 1648         | 1563        | 1566           | 1526        | 1759           | 1579        | 1482        | 1753        | 1711        | 1664        |
| Metabolism                       | 1150         | 1976        | 2296         | 1960        | 2197        | 2282         | 2231        | 2153           | 2051        | 2192           | 2129        | 1995        | 2338        | 2124        | 2473        |
| Poorly Characterized             | 904          | 1293        | 1518         | 1369        | 1482        | 1470         | 1494        | 1569           | 1400        | 1548           | 1595        | 1401        | 1564        | 1691        | 1636        |

**Figure S1:** Heatmaps showing the genome wide distribution of KOG's (eukaryotic orthologous groups) in selected popular white rot, brown rot and soft rot fungi.

**Table S1:** Lists the JGI-MycoCosm KOG group structure and the respective KOG functions divided under the respective KOG groups

| KOG Groups                                | Function Description and KOG ID                                                                                                                                                                                                                                                                                                                                                                                                                                                                                             |
|-------------------------------------------|-----------------------------------------------------------------------------------------------------------------------------------------------------------------------------------------------------------------------------------------------------------------------------------------------------------------------------------------------------------------------------------------------------------------------------------------------------------------------------------------------------------------------------|
| <b>Cellular processes and signaling</b>   | Cell wall/membrane/envelope biogenesis ( <b>M</b> )<br>Cell motility ( <b>N</b> )<br>Posttranslational modification, protein turnover, chaperones ( <b>O</b> )<br>Signal transduction mechanisms ( <b>T</b> )<br>Intracellular trafficking, secretion, and vesicular transport ( <b>U</b> )<br>Defense mechanisms ( <b>V</b> )<br>Extracellular structures ( <b>W</b> )<br>Nuclear structure ( <b>Y</b> )<br>Cytoskeleton ( <b>Z</b> )                                                                                      |
| <b>Information storage and processing</b> | RNA processing and modification ( <b>A</b> )<br>Chromatin structure and dynamics ( <b>B</b> )<br>Translation, ribosomal structure and biogenesis ( <b>J</b> )<br>Transcription ( <b>K</b> )<br>Replication, recombination and repair ( <b>L</b> )                                                                                                                                                                                                                                                                           |
| <b>Metabolism</b>                         | Energy production and conversion ( <b>C</b> )<br>Cell cycle control, cell division, chromosome partitioning ( <b>D</b> )<br>Amino acid transport and metabolism ( <b>E</b> )<br>Nucleotide transport and metabolism ( <b>F</b> )<br>Carbohydrate transport and metabolism ( <b>G</b> )<br>Coenzyme transport and metabolism ( <b>H</b> )<br>Lipid transport and metabolism ( <b>I</b> )<br>Inorganic ion transport and metabolism ( <b>P</b> )<br>Secondary metabolites biosynthesis, transport and catabolism ( <b>Q</b> ) |
| <b>Poorly characterized</b>               | General function prediction only ( <b>R</b> )<br>Function unknown ( <b>S</b> )                                                                                                                                                                                                                                                                                                                                                                                                                                              |

**Table S2:** Heatmaps showing the genome wide distribution of KOG's (eukaryotic orthologous groups) in selected popular white rot fungi.

| CPS                  | P.chr | P.ca | C.sub | H.an | F.me | P.cin | D.sq | T.ve | P.st | P.br | B.ci | P.os | S.hi | P.er |
|----------------------|-------|------|-------|------|------|-------|------|------|------|------|------|------|------|------|
| M                    | 76    | 95   | 86    | 100  | 87   | 85    | 87   | 93   | 88   | 117  | 148  | 78   | 135  | 84   |
| N                    | 5     | 5    | 5     | 7    | 4    | 6     | 5    | 5    | 6    | 9    | 7    | 6    | 5    | 6    |
| O                    | 713   | 700  | 661   | 633  | 671  | 640   | 738  | 765  | 663  | 850  | 663  | 651  | 777  | 705  |
| T                    | 705   | 652  | 703   | 703  | 657  | 594   | 658  | 731  | 763  | 822  | 601  | 662  | 745  | 740  |
| U                    | 340   | 319  | 299   | 341  | 332  | 328   | 316  | 335  | 313  | 365  | 344  | 337  | 349  | 351  |
| V                    | 149   | 132  | 149   | 172  | 139  | 157   | 152  | 197  | 175  | 203  | 158  | 163  | 290  | 218  |
| W                    | 91    | 69   | 83    | 104  | 56   | 96    | 73   | 103  | 96   | 107  | 67   | 104  | 188  | 160  |
| Y                    | 102   | 93   | 122   | 84   | 147  | 114   | 92   | 144  | 94   | 148  | 141  | 100  | 167  | 159  |
| Z                    | 242   | 219  | 192   | 203  | 198  | 207   | 197  | 203  | 208  | 234  | 206  | 213  | 212  | 231  |
| All                  | 2423  | 2284 | 2300  | 2347 | 2291 | 2227  | 2318 | 2576 | 2406 | 2855 | 2335 | 2314 | 2868 | 2654 |
| ISP                  | P.chr | P.ca | C.sub | H.an | F.me | P.cin | D.sq | T.ve | P.st | P.br | B.ci | P.os | S.hi | P.er |
| A                    | 489   | 382  | 385   | 457  | 389  | 402   | 425  | 445  | 392  | 475  | 382  | 381  | 460  | 424  |
| B                    | 201   | 184  | 182   | 174  | 168  | 204   | 188  | 236  | 187  | 227  | 186  | 172  | 229  | 190  |
| J                    | 366   | 346  | 292   | 327  | 312  | 330   | 338  | 339  | 314  | 388  | 378  | 334  | 344  | 349  |
| K                    | 415   | 396  | 379   | 462  | 399  | 377   | 399  | 428  | 383  | 504  | 450  | 439  | 502  | 484  |
| L                    | 242   | 231  | 244   | 221  | 189  | 240   | 225  | 277  | 228  | 277  | 219  | 244  | 256  | 254  |
| All                  | 1713  | 1539 | 1482  | 1641 | 1457 | 1553  | 1575 | 1725 | 1504 | 1871 | 1615 | 1570 | 1791 | 1701 |
| Metabolism           | P.chr | P.ca | C.sub | H.an | F.me | P.cin | D.sq | T.ve | P.st | P.br | B.ci | P.os | S.hi | P.er |
| C                    | 352   | 393  | 330   | 311  | 310  | 309   | 349  | 383  | 346  | 402  | 341  | 312  | 391  | 314  |
| D                    | 233   | 219  | 209   | 221  | 215  | 227   | 212  | 247  | 208  | 270  | 199  | 232  | 235  | 271  |
| E                    | 258   | 252  | 224   | 226  | 233  | 246   | 246  | 260  | 244  | 312  | 309  | 243  | 297  | 239  |
| F                    | 84    | 84   | 77    | 89   | 76   | 71    | 89   | 82   | 81   | 150  | 77   | 82   | 92   | 81   |
| G                    | 335   | 343  | 331   | 350  | 362  | 335   | 390  | 401  | 362  | 433  | 451  | 342  | 500  | 365  |
| H                    | 98    | 101  | 93    | 95   | 99   | 88    | 101  | 99   | 98   | 132  | 103  | 97   | 119  | 95   |
| I                    | 312   | 362  | 302   | 262  | 299  | 281   | 304  | 339  | 286  | 372  | 340  | 302  | 347  | 327  |
| P                    | 163   | 157  | 153   | 142  | 140  | 137   | 158  | 169  | 151  | 201  | 204  | 170  | 197  | 179  |
| Q                    | 344   | 490  | 392   | 305  | 276  | 250   | 369  | 384  | 315  | 493  | 343  | 314  | 486  | 288  |
| All                  | 2179  | 2401 | 2111  | 2001 | 2010 | 1944  | 2218 | 2364 | 2091 | 2765 | 2367 | 2094 | 2664 | 2159 |
| Poorly Characterized | P.chr | P.ca | C.sub | H.an | F.me | P.cin | D.sq | T.ve | P.st | P.br | B.ci | P.os | S.hi | P.er |
| R                    | 1137  | 1208 | 1039  | 1207 | 1053 | 1238  | 1136 | 1186 | 1129 | 1324 | 1248 | 1073 | 1291 | 1110 |
| S                    | 430   | 393  | 396   | 436  | 448  | 372   | 431  | 413  | 439  | 468  | 410  | 423  | 424  | 457  |
| All                  | 1567  | 1601 | 1435  | 1643 | 1501 | 1610  | 1567 | 1599 | 1568 | 1792 | 1658 | 1496 | 1715 | 1567 |

**Table S3:** Heatmaps showing the genome wide distribution of KOG's (eukaryotic orthologous groups) in selected popular brown rot fungi.

| CPS        | P.pl | F.ra | W.co | D.pr | D.qu | L.su | P.pl | N.le | S.la | C.co | G.tr | F.he | F.pi | H.pi | C.pu |
|------------|------|------|------|------|------|------|------|------|------|------|------|------|------|------|------|
| M          | 56   | 93   | 94   | 72   | 93   | 101  | 84   | 89   | 101  | 74   | 81   | 92   | 92   | 88   | 92   |
| N          | 1    | 3    | 6    | 5    | 6    | 5    | 5    | 6    | 5    | 5    | 5    | 4    | 6    | 5    | 4    |
| O          | 316  | 593  | 688  | 605  | 680  | 724  | 689  | 658  | 620  | 656  | 644  | 642  | 724  | 671  | 759  |
| T          | 553  | 534  | 651  | 615  | 614  | 589  | 716  | 666  | 576  | 805  | 664  | 597  | 668  | 751  | 652  |
| U          | 134  | 308  | 347  | 304  | 333  | 348  | 327  | 338  | 324  | 320  | 332  | 334  | 348  | 345  | 329  |
| V          | 204  | 135  | 139  | 145  | 140  | 120  | 187  | 158  | 124  | 198  | 140  | 120  | 150  | 182  | 169  |
| W          | 107  | 77   | 83   | 72   | 75   | 55   | 110  | 74   | 63   | 118  | 54   | 66   | 78   | 112  | 111  |
| Y          | 82   | 77   | 115  | 49   | 99   | 106  | 92   | 88   | 85   | 94   | 106  | 103  | 124  | 104  | 136  |
| Z          | 137  | 156  | 207  | 181  | 204  | 216  | 216  | 185  | 185  | 231  | 176  | 189  | 231  | 198  | 203  |
| All        | 1590 | 1976 | 2330 | 2048 | 2244 | 2264 | 2426 | 2262 | 2083 | 2501 | 2202 | 2147 | 2421 | 2456 | 2455 |
| ISP        | P.pl | F.ra | W.co | D.pr | D.qu | L.su | P.pl | N.le | S.la | C.co | G.tr | F.he | F.pi | H.pi | C.pu |
| A          | 296  | 354  | 467  | 290  | 445  | 431  | 442  | 395  | 340  | 391  | 407  | 365  | 464  | 425  | 414  |
| B          | 103  | 148  | 174  | 154  | 185  | 183  | 161  | 188  | 193  | 226  | 182  | 175  | 210  | 214  | 199  |
| J          | 253  | 309  | 351  | 324  | 347  | 361  | 336  | 350  | 346  | 382  | 348  | 340  | 365  | 371  | 355  |
| K          | 244  | 326  | 411  | 373  | 390  | 420  | 401  | 403  | 396  | 478  | 399  | 395  | 447  | 442  | 453  |
| L          | 139  | 192  | 246  | 212  | 231  | 253  | 223  | 230  | 251  | 282  | 243  | 207  | 267  | 259  | 243  |
| All        | 1035 | 1329 | 1649 | 1353 | 1598 | 1648 | 1563 | 1566 | 1526 | 1759 | 1579 | 1482 | 1753 | 1711 | 1664 |
| Metabolism | P.pl | F.ra | W.co | D.pr | D.qu | L.su | P.pl | N.le | S.la | C.co | G.tr | F.he | F.pi | H.pi | C.pu |
| C          | 146  | 297  | 337  | 310  | 374  | 345  | 354  | 354  | 309  | 348  | 362  | 320  | 366  | 339  | 396  |
| D          | 129  | 199  | 251  | 202  | 231  | 259  | 219  | 211  | 231  | 254  | 214  | 232  | 251  | 245  | 241  |
| E          | 88   | 224  | 267  | 240  | 241  | 269  | 246  | 268  | 238  | 254  | 262  | 226  | 246  | 255  | 264  |
| F          | 39   | 70   | 109  | 77   | 82   | 96   | 92   | 96   | 79   | 79   | 91   | 86   | 92   | 86   | 96   |
| G          | 202  | 296  | 316  | 340  | 335  | 363  | 312  | 332  | 296  | 382  | 323  | 356  | 364  | 316  | 355  |
| H          | 58   | 104  | 119  | 92   | 124  | 113  | 113  | 116  | 105  | 93   | 111  | 105  | 125  | 100  | 127  |
| I          | 153  | 311  | 339  | 256  | 313  | 334  | 339  | 310  | 321  | 279  | 326  | 251  | 332  | 303  | 367  |
| P          | 108  | 131  | 162  | 135  | 161  | 155  | 159  | 144  | 135  | 161  | 140  | 152  | 174  | 146  | 160  |
| Q          | 227  | 344  | 396  | 308  | 336  | 348  | 397  | 322  | 337  | 342  | 300  | 267  | 388  | 334  | 467  |
| All        | 1150 | 1976 | 2296 | 1960 | 2197 | 2282 | 2231 | 2153 | 2051 | 2192 | 2129 | 1995 | 2338 | 2124 | 2473 |
| Poorly     | P.pl | F.ra | W.co | D.pr | D.qu | L.su | P.pl | N.le | S.la | C.co | G.tr | F.he | F.pi | H.pi | C.pu |
| R          | 700  | 943  | 1090 | 1010 | 1064 | 1029 | 1106 | 1150 | 985  | 1127 | 1155 | 998  | 1138 | 1167 | 1190 |
| S          | 204  | 350  | 428  | 359  | 418  | 441  | 388  | 419  | 415  | 421  | 440  | 403  | 426  | 524  | 446  |
| All        | 904  | 1293 | 1518 | 1369 | 1482 | 1470 | 1494 | 1569 | 1400 | 1548 | 1595 | 1401 | 1564 | 1691 | 1636 |

**Table S4:** Heatmaps showing the genome wide distribution of KOG's (eukaryotic orthologous groups) in selected popular soft rot fungi.

| CPS        | T.re | R.or | A.we | P.ch | D.es | Hypo | A.ni | Hy.EC38 | N.cr | Hy.CO27 | F.ox | Lecy | B.do |
|------------|------|------|------|------|------|------|------|---------|------|---------|------|------|------|
| M          | 87   | 144  | 110  | 132  | 94   | 88   | 117  | 106     | 93   | 105     | 241  | 90   | 153  |
| N          | 5    | 11   | 6    | 6    | 4    | 6    | 5    | 5       | 6    | 5       | 8    | 5    | 6    |
| O          | 559  | 859  | 609  | 566  | 627  | 663  | 621  | 656     | 682  | 667     | 1185 | 523  | 675  |
| T          | 516  | 1012 | 546  | 608  | 514  | 515  | 545  | 524     | 700  | 526     | 1245 | 370  | 683  |
| U          | 313  | 566  | 343  | 338  | 327  | 344  | 310  | 334     | 382  | 336     | 557  | 303  | 324  |
| V          | 109  | 93   | 100  | 126  | 129  | 120  | 125  | 133     | 180  | 119     | 287  | 44   | 218  |
| W          | 65   | 27   | 40   | 65   | 84   | 73   | 66   | 75      | 118  | 68      | 173  | 11   | 130  |
| Y          | 106  | 86   | 112  | 104  | 99   | 111  | 91   | 96      | 148  | 90      | 258  | 28   | 139  |
| Z          | 180  | 339  | 187  | 202  | 173  | 183  | 187  | 193     | 226  | 203     | 433  | 128  | 225  |
|            | 1940 | 3137 | 2053 | 2147 | 2051 | 2103 | 2067 | 2122    | 2535 | 2119    | 4387 | 1502 | 2553 |
| ISP        | T.re | R.or | A.we | P.ch | D.es | Hypo | A.ni | Hy.EC38 | N.cr | Hy.CO27 | F.ox | Lecy | B.do |
| A          | 346  | 354  | 326  | 360  | 348  | 386  | 312  | 361     | 429  | 347     | 621  | 238  | 441  |
| B          | 136  | 277  | 138  | 143  | 174  | 166  | 131  | 176     | 228  | 182     | 380  | 94   | 193  |
| J          | 339  | 657  | 347  | 344  | 338  | 344  | 337  | 356     | 383  | 353     | 552  | 325  | 377  |
| K          | 393  | 686  | 362  | 388  | 401  | 410  | 360  | 406     | 676  | 414     | 883  | 262  | 484  |
| L          | 192  | 247  | 194  | 238  | 213  | 208  | 195  | 209     | 223  | 213     | 435  | 193  | 239  |
|            | 1406 | 2221 | 1367 | 1473 | 1474 | 1514 | 1335 | 1508    | 1939 | 1509    | 2871 | 1112 | 1734 |
| Metabolism | T.re | R.or | A.we | P.ch | D.es | Hypo | A.ni | Hy.EC38 | N.cr | Hy.CO27 | F.ox | Lecy | B.do |
| C          | 316  | 380  | 463  | 411  | 382  | 392  | 474  | 401     | 312  | 403     | 813  | 319  | 487  |
| D          | 196  | 358  | 191  | 216  | 201  | 194  | 193  | 198     | 238  | 204     | 415  | 162  | 212  |
| E          | 290  | 333  | 428  | 398  | 298  | 312  | 413  | 319     | 281  | 319     | 738  | 291  | 412  |
| F          | 95   | 102  | 97   | 103  | 92   | 90   | 98   | 91      | 95   | 94      | 169  | 93   | 111  |
| G          | 346  | 430  | 506  | 457  | 419  | 442  | 482  | 454     | 419  | 451     | 923  | 315  | 551  |
| H          | 95   | 101  | 133  | 123  | 106  | 110  | 136  | 113     | 115  | 112     | 199  | 109  | 141  |
| I          | 297  | 385  | 429  | 399  | 318  | 343  | 428  | 370     | 277  | 372     | 695  | 288  | 458  |
| P          | 177  | 236  | 197  | 219  | 204  | 191  | 197  | 208     | 238  | 219     | 456  | 139  | 238  |
| Q          | 262  | 150  | 450  | 380  | 366  | 392  | 485  | 435     | 181  | 433     | 808  | 270  | 618  |
|            | 2074 | 2475 | 2894 | 2706 | 2386 | 2466 | 2906 | 2589    | 2156 | 2607    | 5216 | 1986 | 3228 |
| Poorly     | T.re | R.or | A.we | P.ch | D.es | Hypo | A.ni | Hy.EC38 | N.cr | Hy.CO27 | F.ox | Lecy | B.do |
| R          | 1030 | 1907 | 1452 | 1557 | 1216 | 1307 | 1459 | 1321    | 1136 | 1343    | 2763 | 1009 | 1649 |
| S          | 383  | 532  | 373  | 372  | 407  | 403  | 373  | 420     | 445  | 416     | 618  | 344  | 407  |
|            | 1413 | 2439 | 1825 | 1929 | 1623 | 1710 | 1832 | 1741    | 1581 | 1759    | 3381 | 1353 | 2056 |

**Figure-S2:** Hierarchical dendrograms of all the selected fungi based on their genome wide distribution of plant cell wall degrading enzymes:

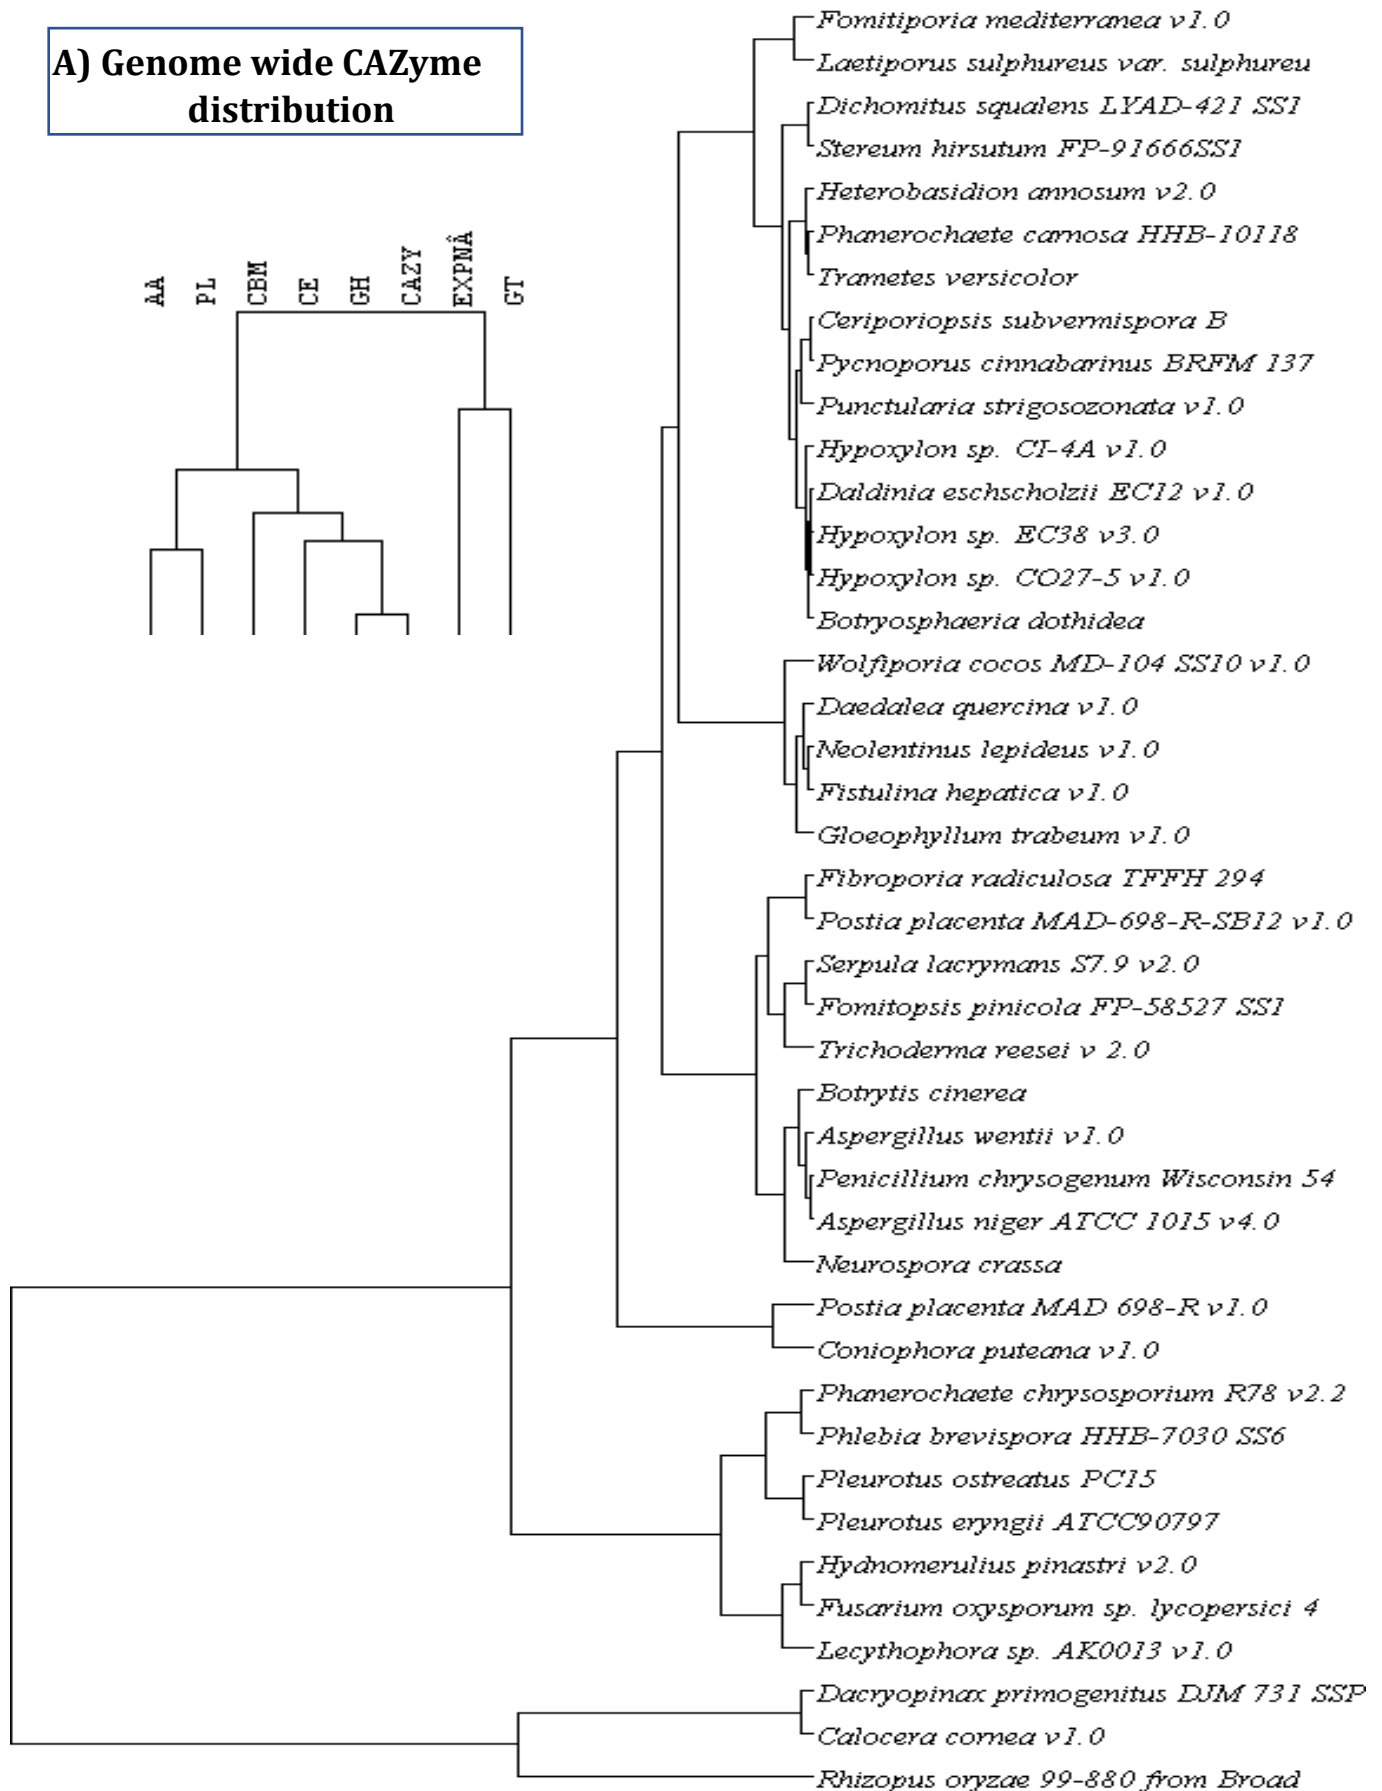

**B) Genome wide Auxiliary Activity (Ligninolytic) enzymes**

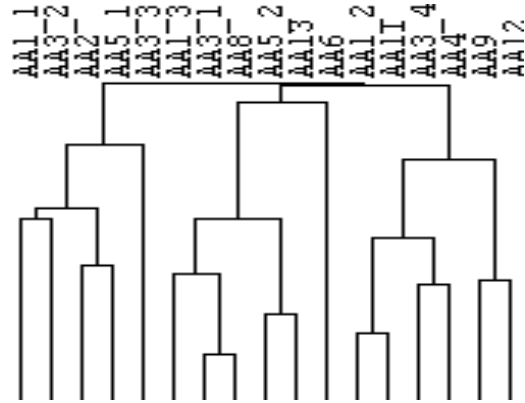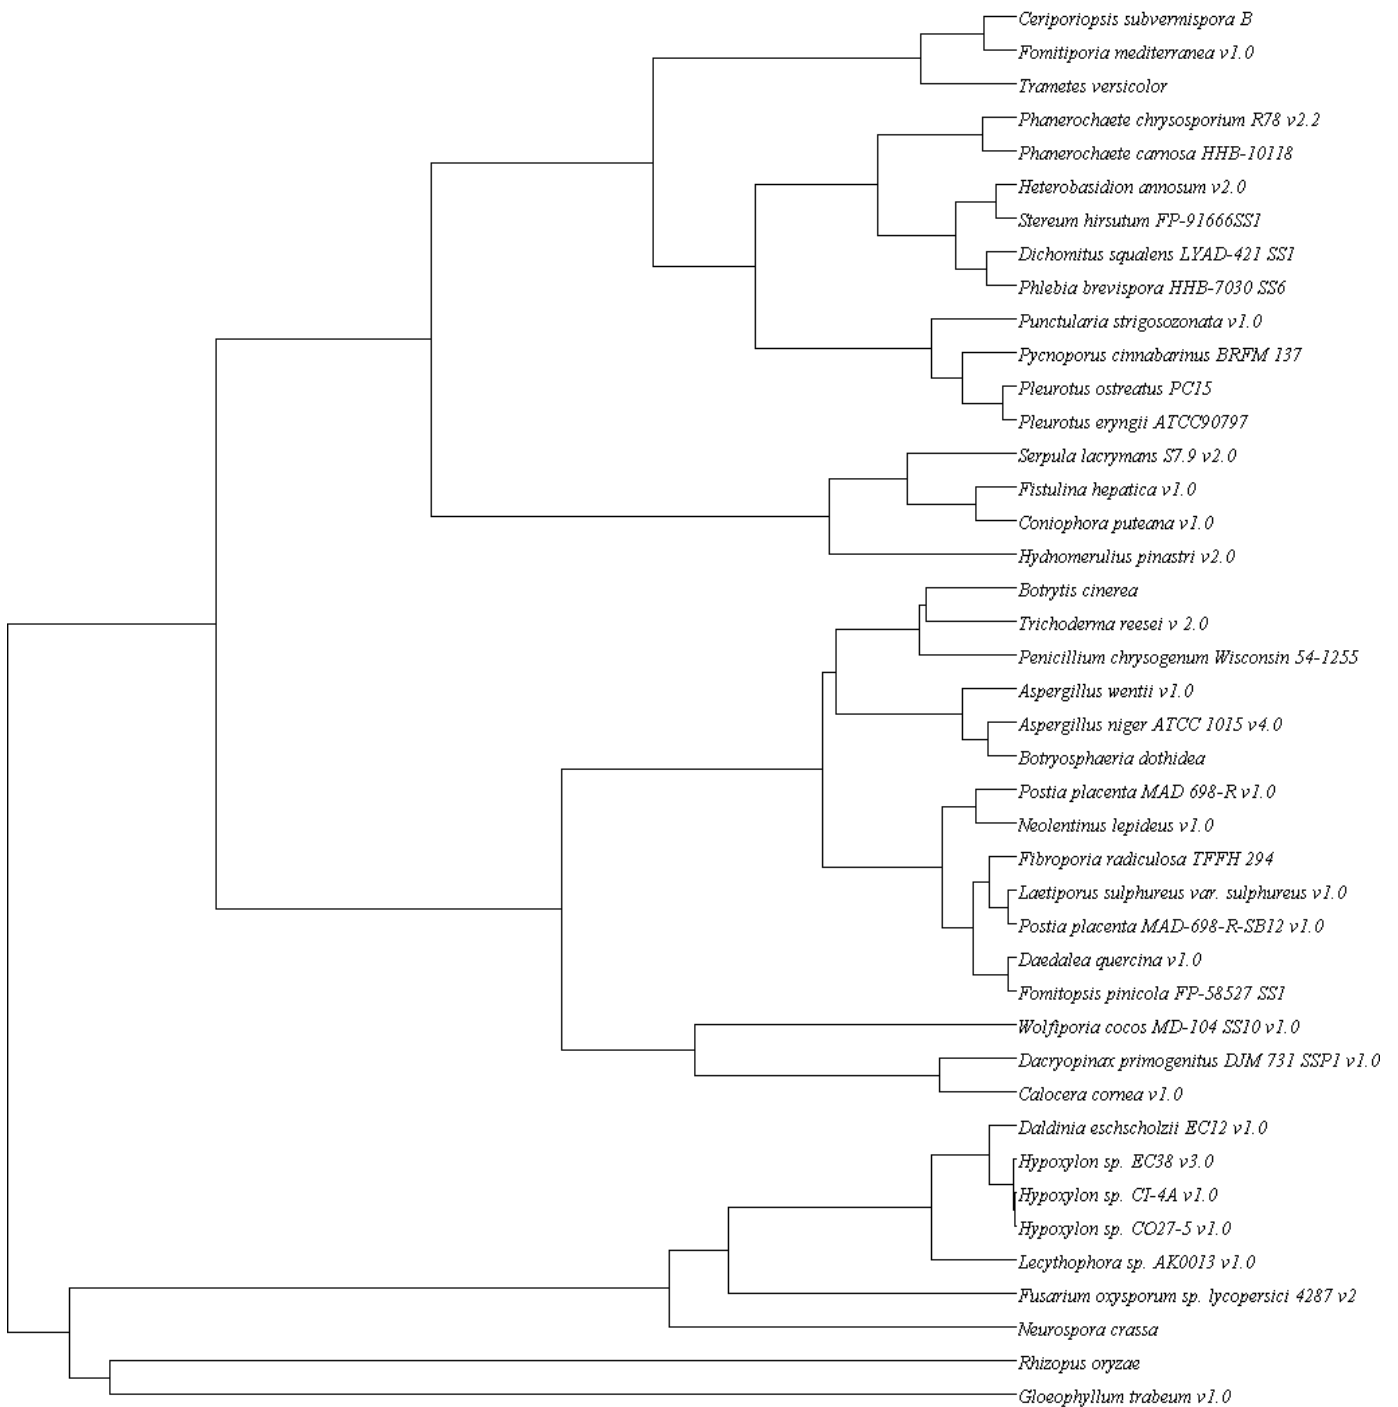

**C) Genome wide Cellulolytic enzymes**

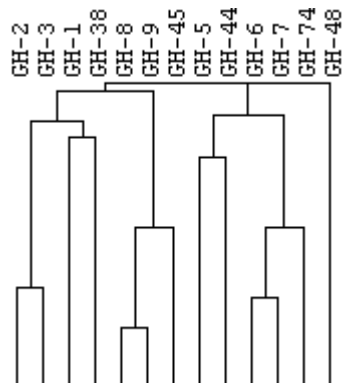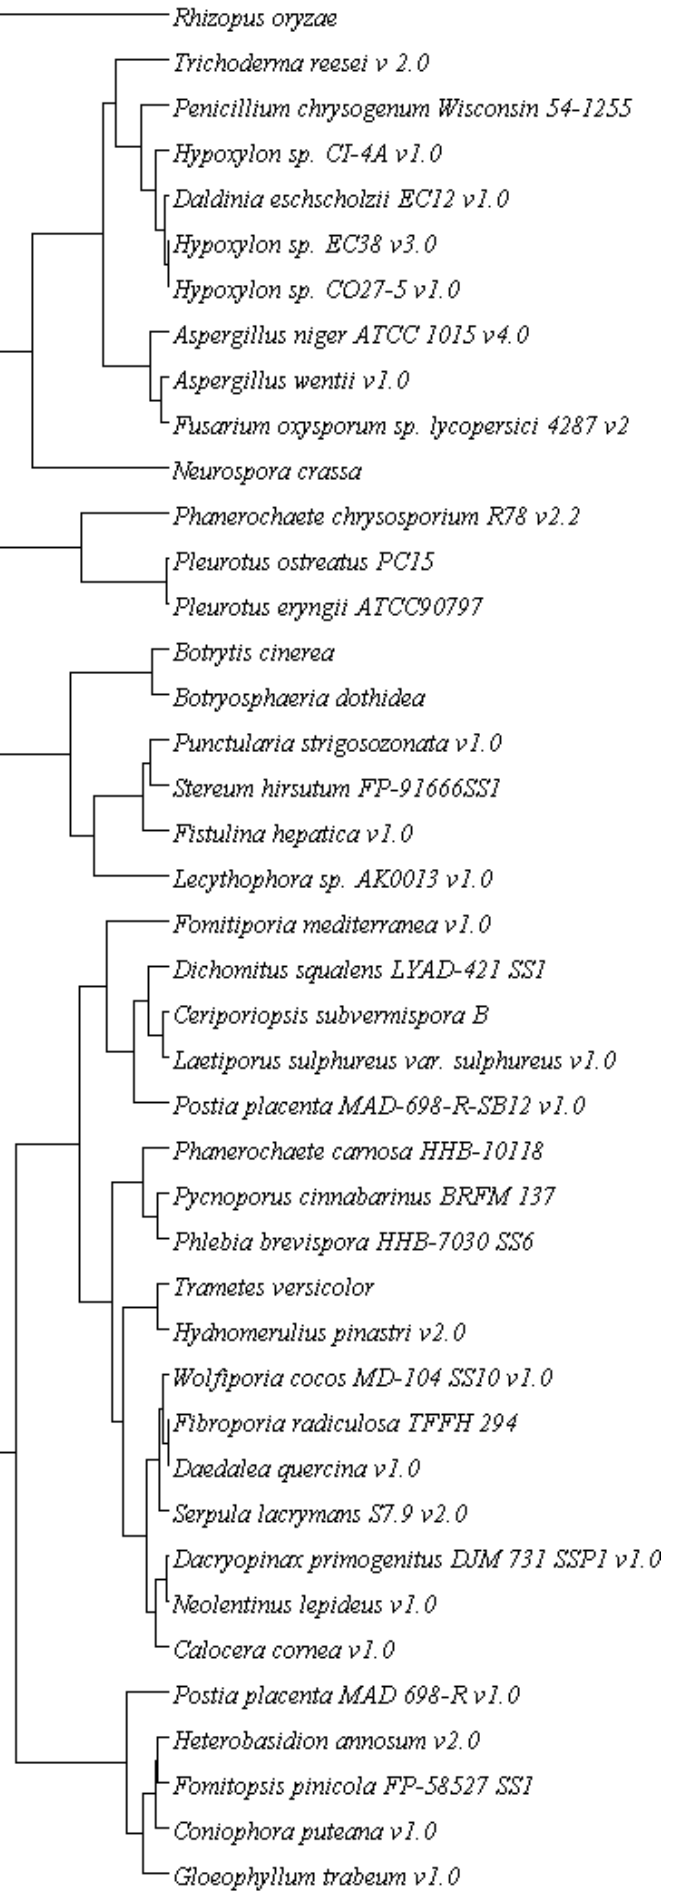



**D) Genome wide Hemicellulolytic enzymes**

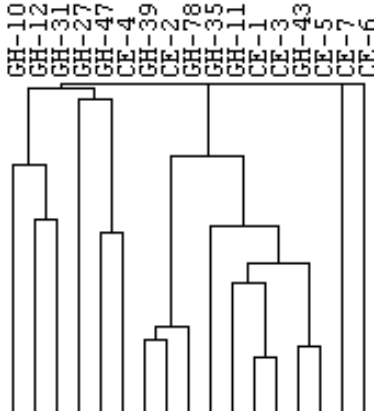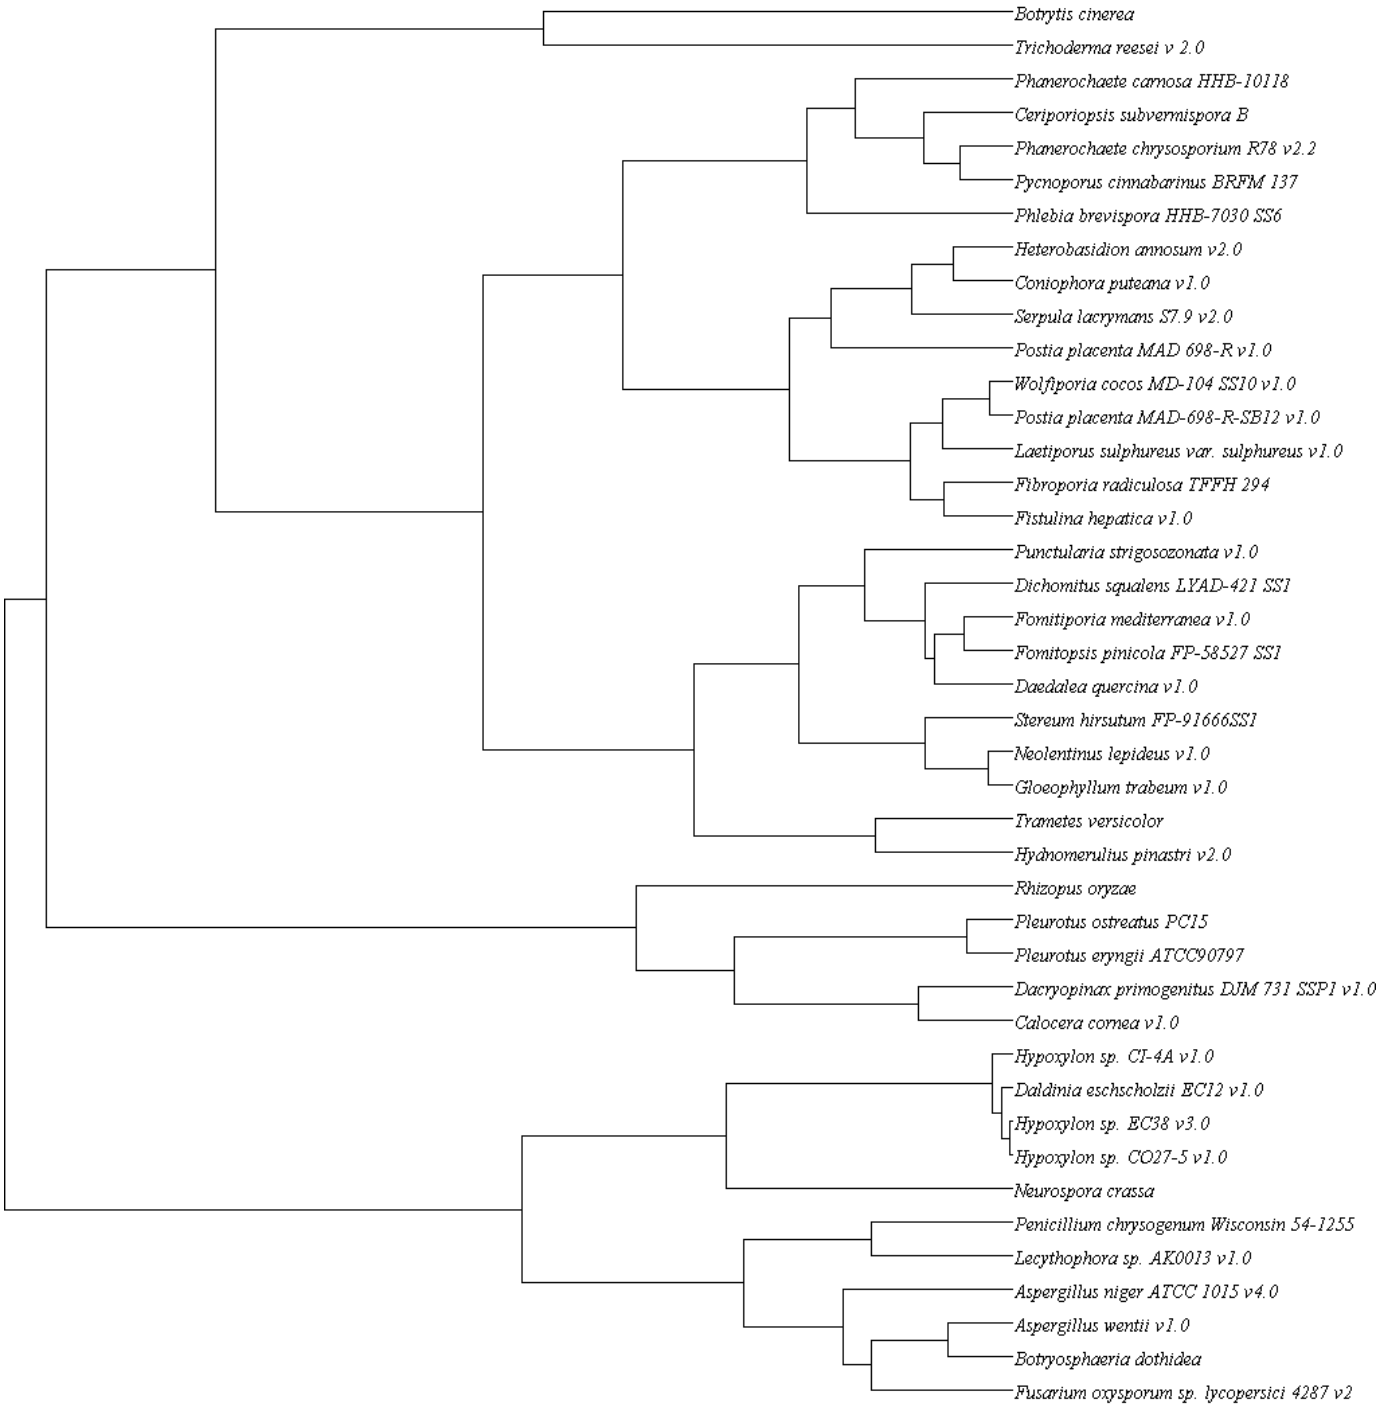

## E) Genome wide Pectinolytic enzymes

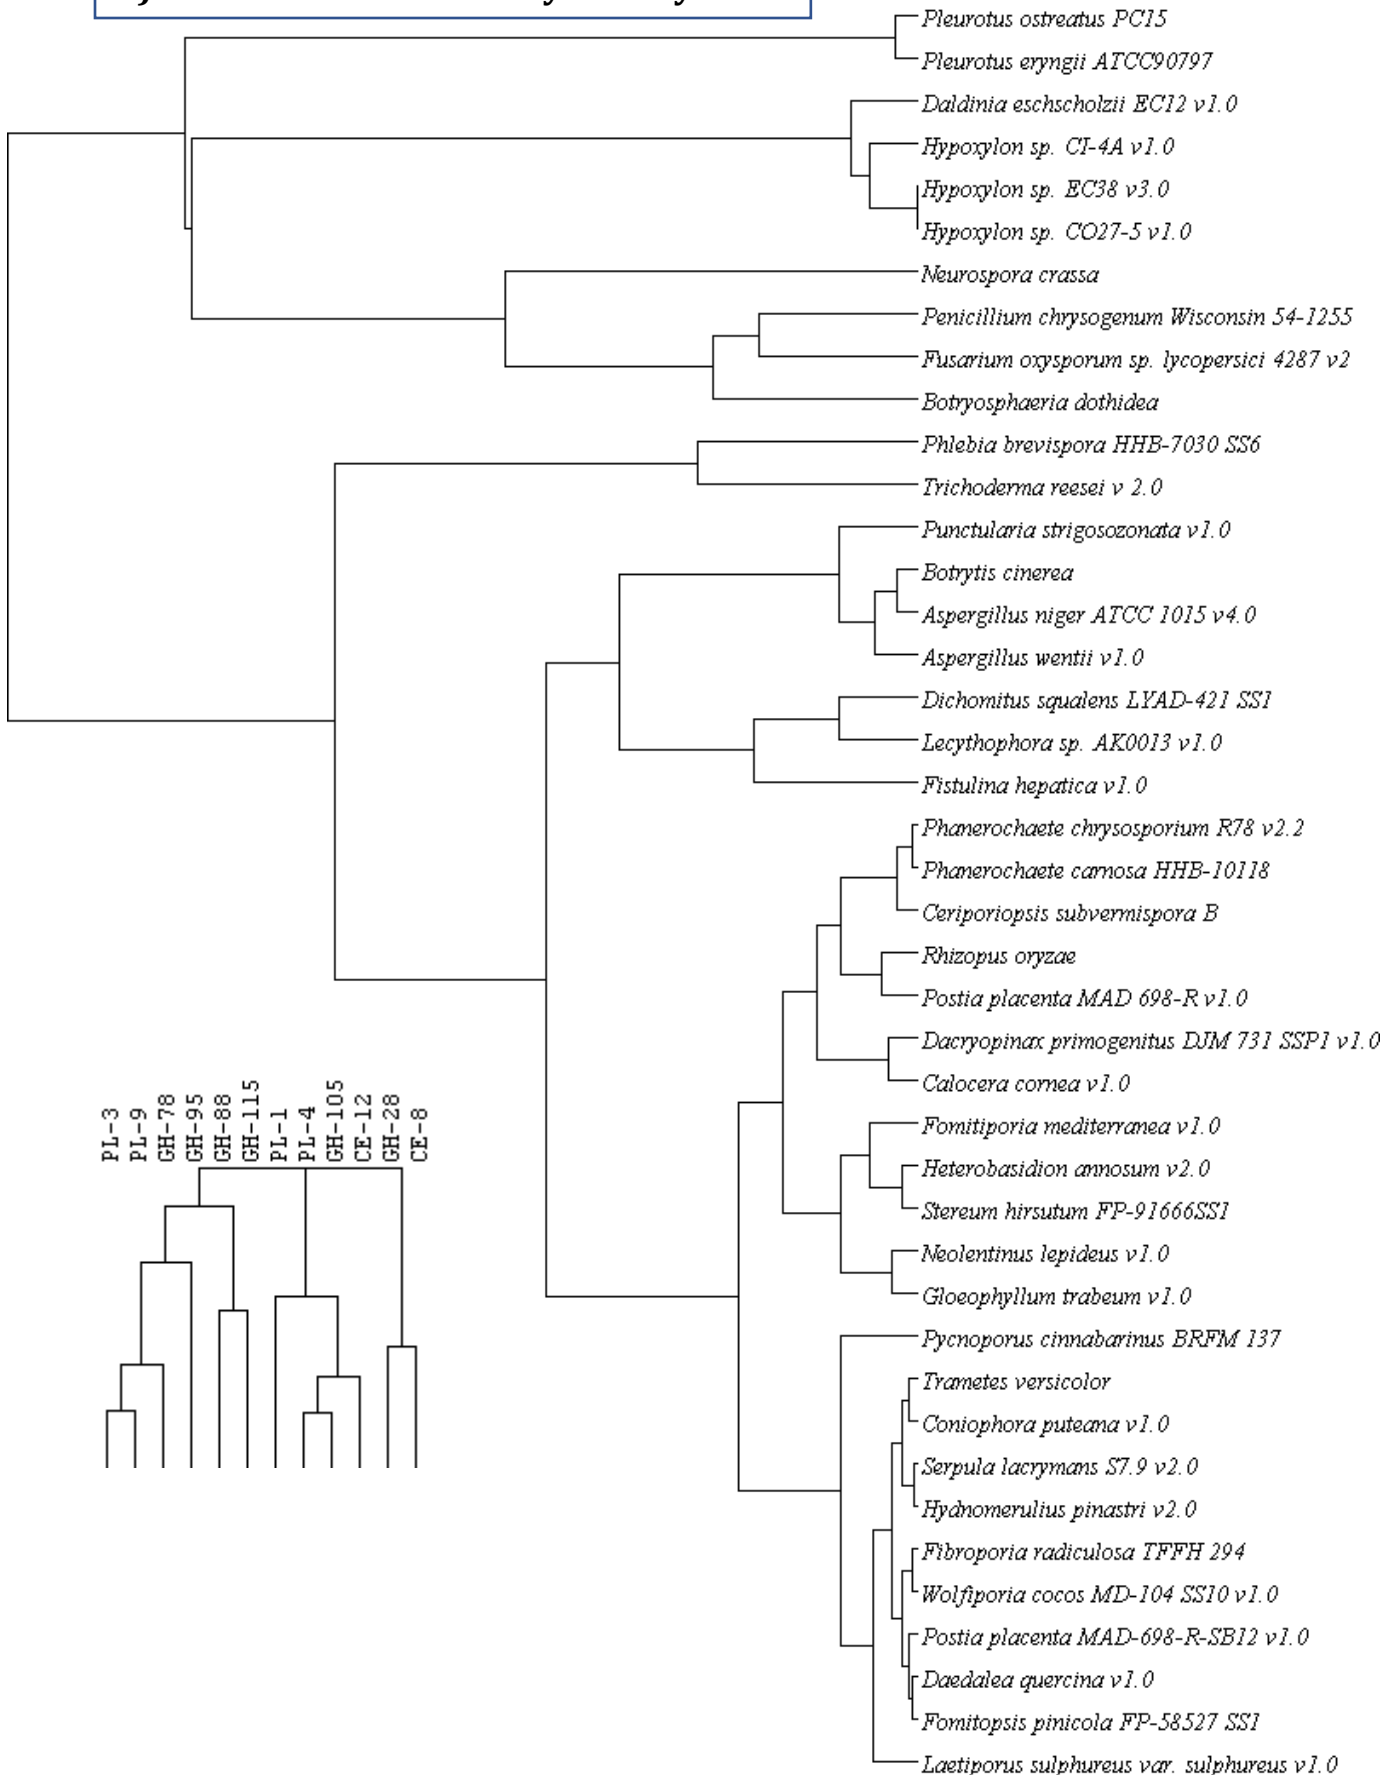

## F) Total Lignocellulolytic activities

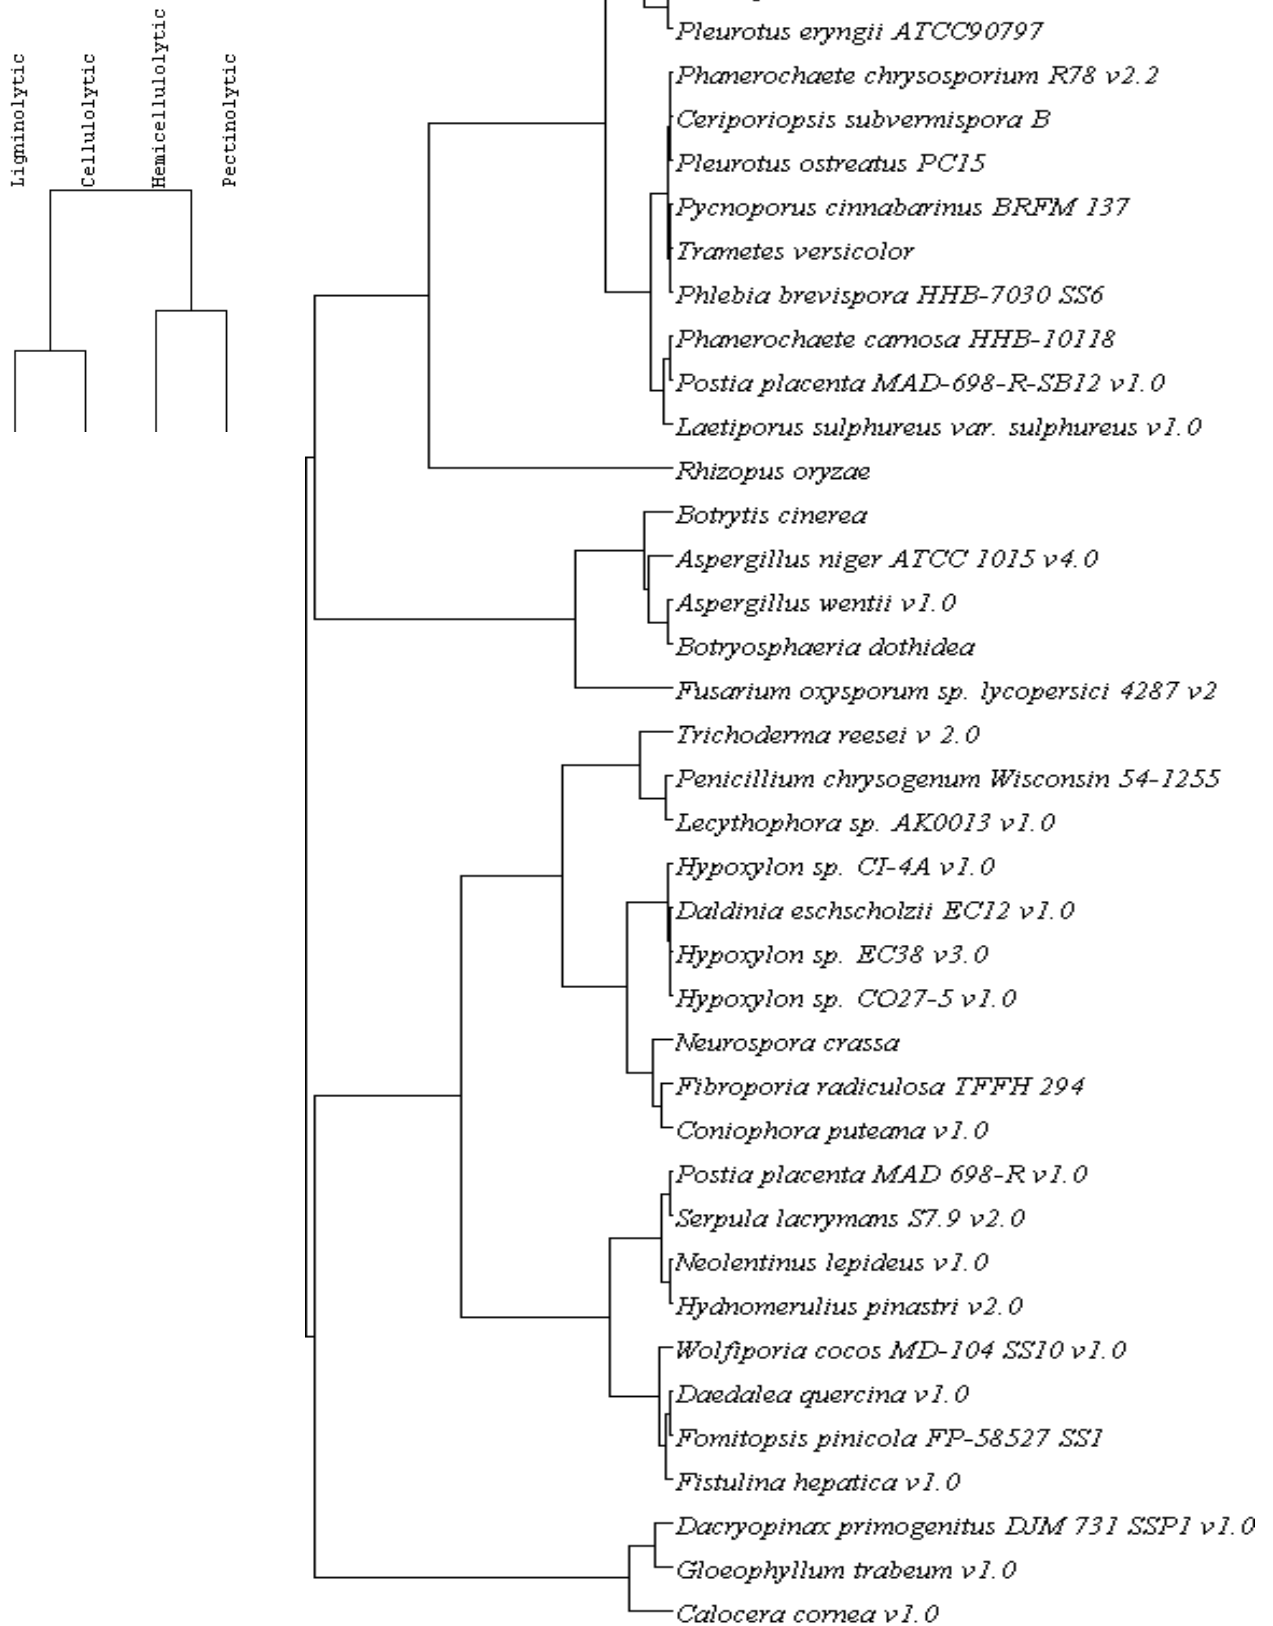

### G) Cellular Processes and Signaling (KOG)

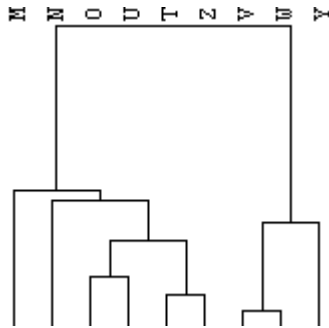

- Postia placenta* MAD 698-R v1.0
- Stereum hirsutum* FP-91666SS1
- Pleurotus eryngii* ATCC90797
- Punctularia strigosozonata* v1.0
- Calocera cornea* v1.0
- Phanerochaete chrysosporium* R78 v2.2
- Pleurotus ostreatus* PC15
- Dacryopinax primogenitus* DJM 731 SSP1 v1.0
- Postia placenta* MAD-698-R-SB12 v1.0
- Heterobasidion annosum* v2.0
- Hydnomerulius pinastri* v2.0
- Neolentinus lepideus* v1.0
- Gloeophyllum trabeum* v1.0
- Neurospora crassa*
- Ceriporiopsis subvermispora* B
- Fusarium oxysporum* sp. *lycopersici* 4287 v2
- Botryosphaeria dothidea*
- Trametes versicolor*
- Phlebia brevispora* HHB-7030 SS6
- Dichomitus squalens* LYAD-421 SS1
- Coniophora puteana* v1.0
- Fomitiporia mediterranea* v1.0
- Phanerochaete camosa* HHB-10118
- Daedalea quercina* v1.0
- Fomitopsis pinicola* FP-58527 SS1
- Fycnopus cinnabarinus* BRFM 137
- Wolfiporia cocos* MD-104 SS10 v1.0
- Fistulina hepatica* v1.0
- Botrytis cinerea*
- Trichoderma reesei* v 2.0
- Aspergillus wentii* v1.0
- Fibroporia radiculosa* TFFH 294
- Serpula lacrymans* S7.9 v2.0
- Aspergillus niger* ATCC 1015 v4.0
- Laetiporus sulphureus* var. *sulphureus* v1.0
- Hypoxylon* sp. EC38 v3.0
- Hypoxylon* sp. CO27-5 v1.0
- Daldinia eschscholzii* EC12 v1.0
- Hypoxylon* sp. CI-4A v1.0
- Rhizopus oryzae*
- Penicillium chrysogenum* Wisconsin 54-1255
- Lecythophora* sp. AK0013 v1.0

## H) Information Storage Processing (KOG)

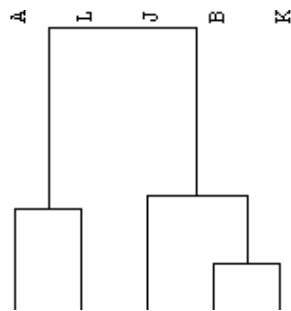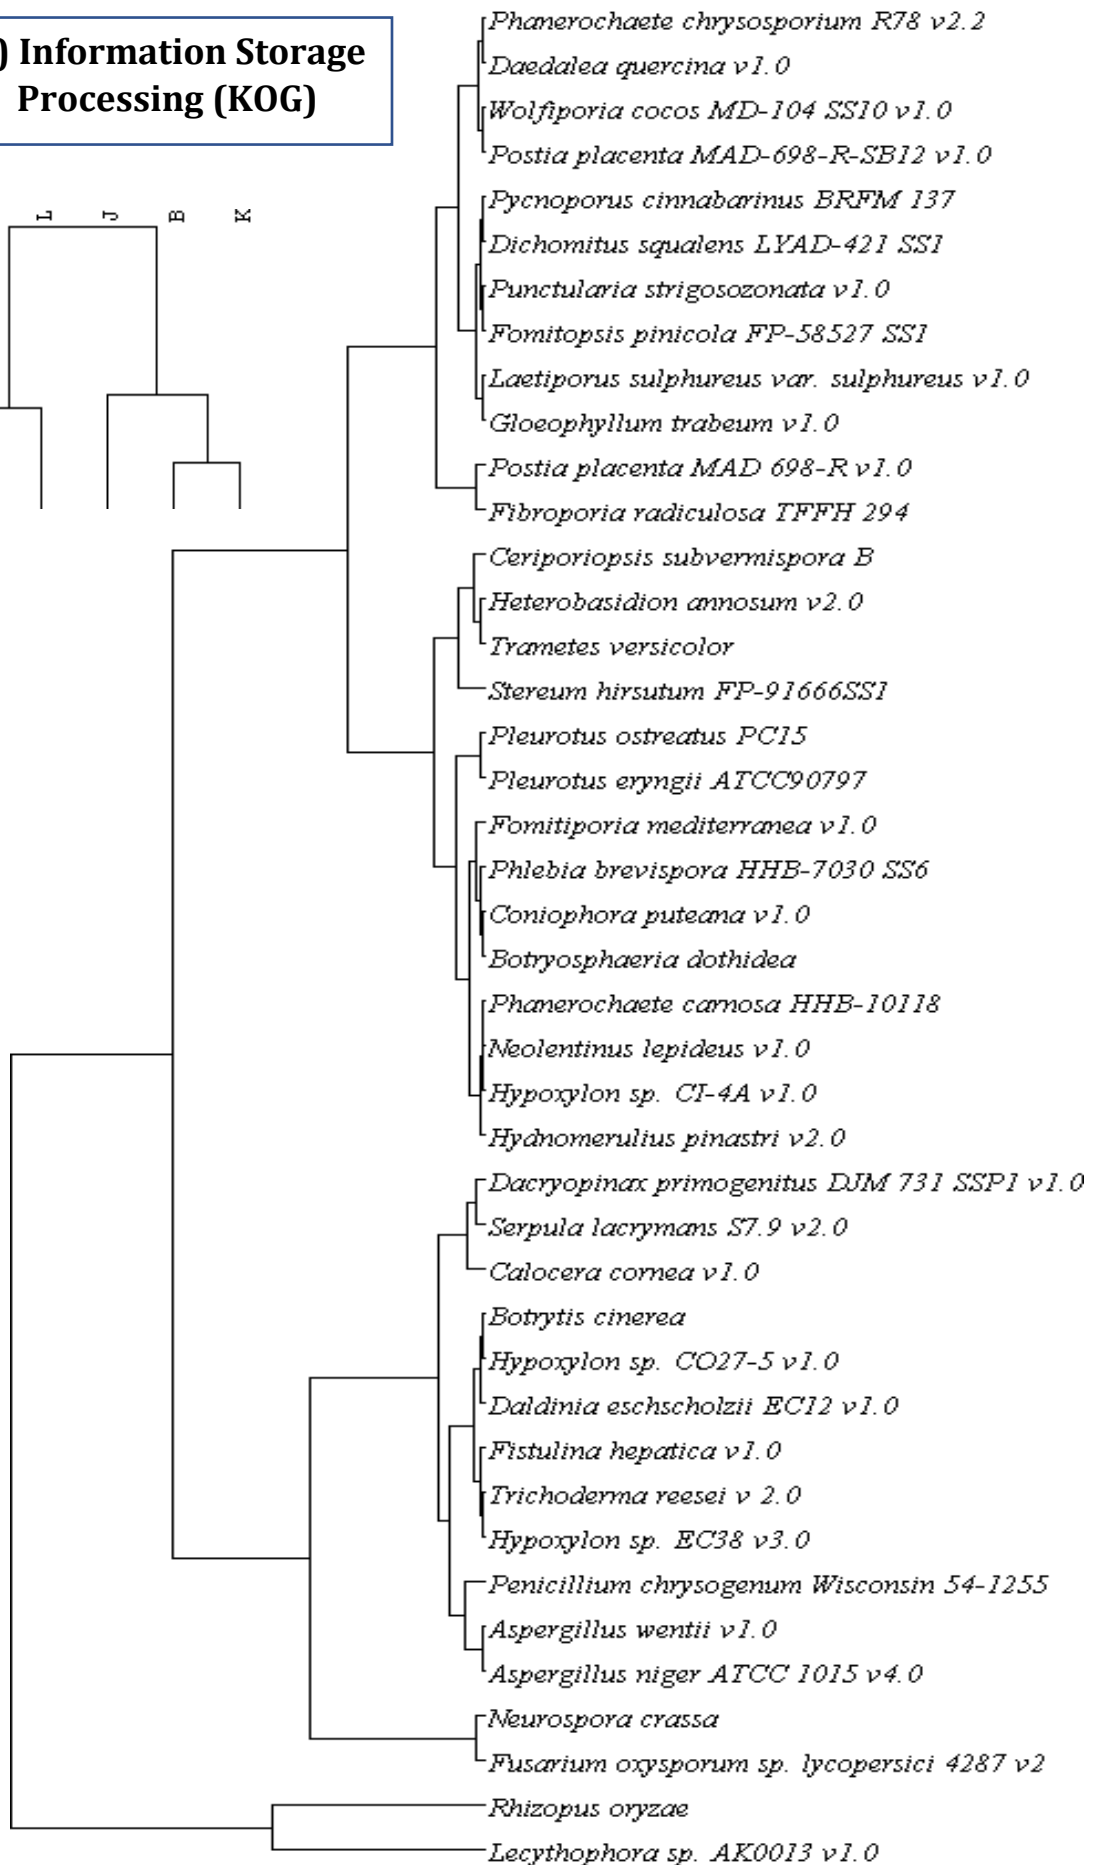

# I) Metabolism (KOG)

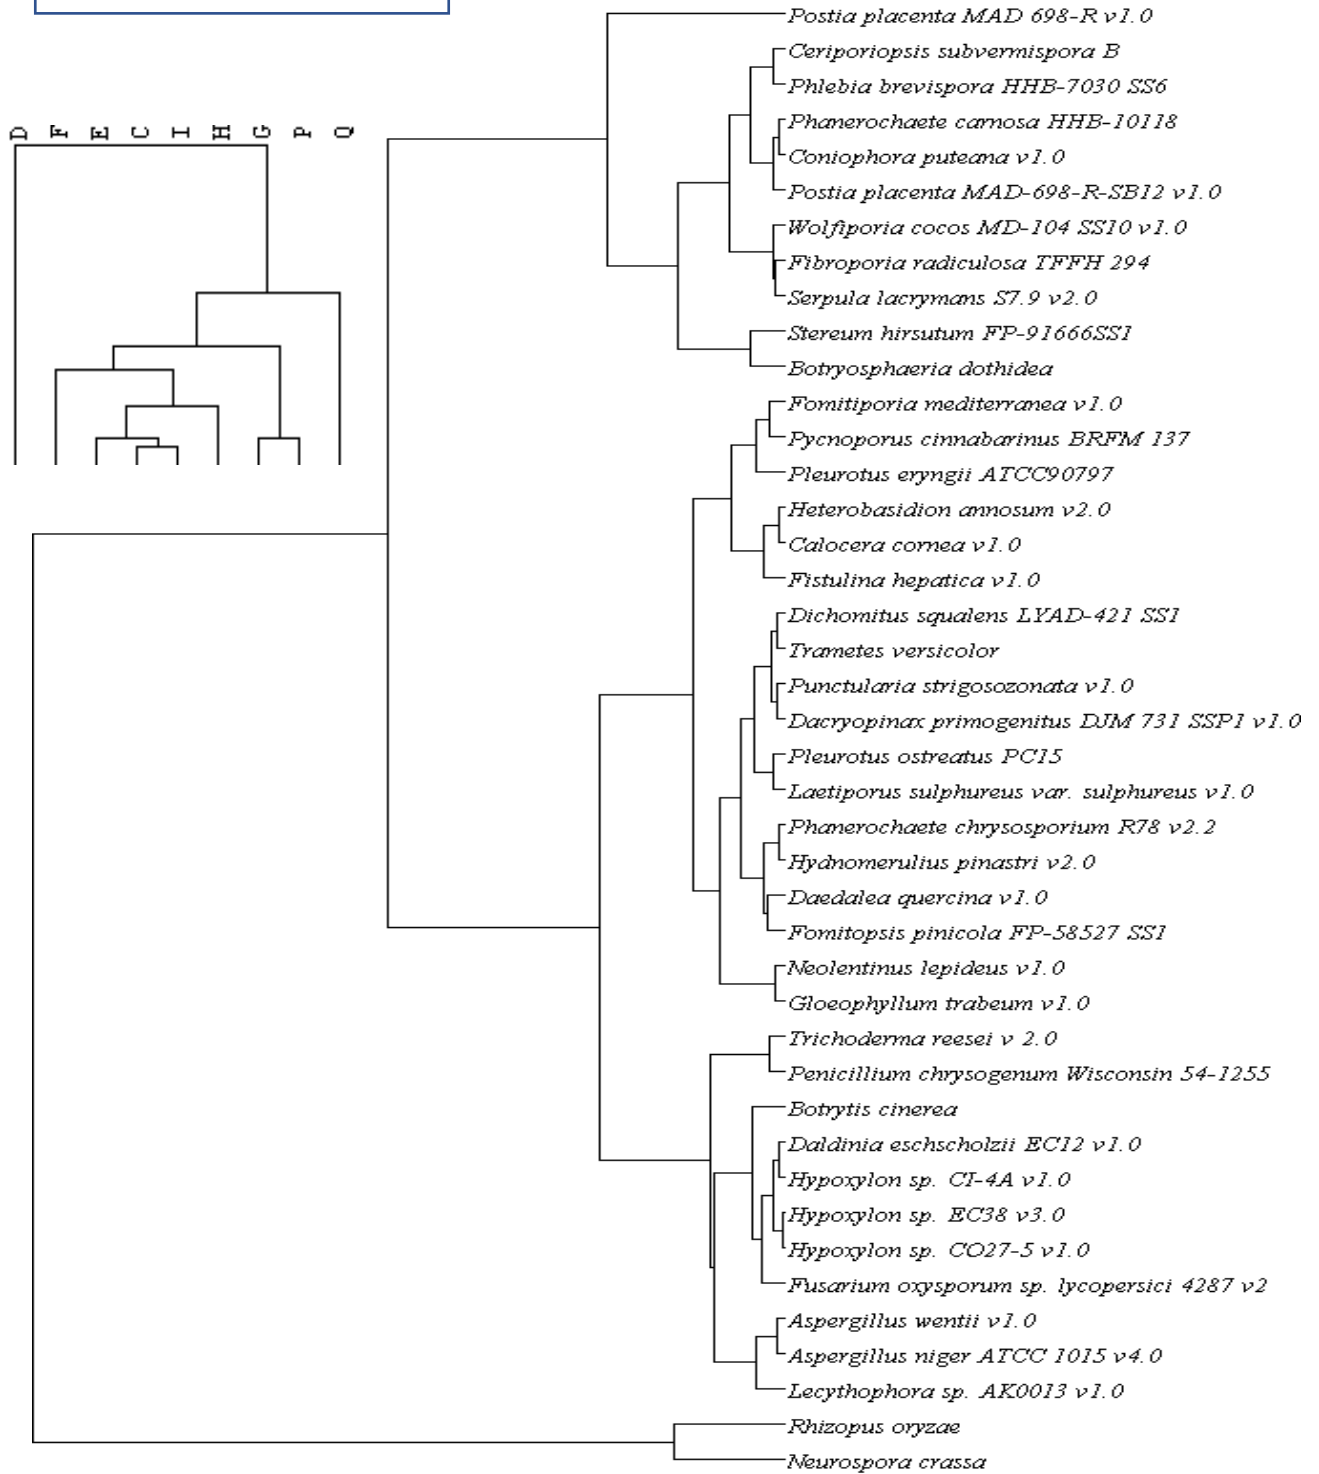

| A    | Class | P.ch | P.ca | C.su | H.an | F.me | P.cin | D.sq | T.ve | P.st | P.br | B.ci | P.os | S.hi | P.er |
|------|-------|------|------|------|------|------|-------|------|------|------|------|------|------|------|------|
|      | AA1 1 | 0    | 0    | 7    | 12   | 10   | 5     | 11   | 7    | 12   | 8    | 10   | 11   | 15   | 10   |
|      | AA1 2 | 1    | 1    | 1    | 1    | 1    | 1     | 1    | 2    | 1    | 2    | 1    | 1    | 2    | 1    |
|      | AA1 3 | 4    | 10   | 1    | 3    | 1    | 1     | 1    | 1    | 0    | 1    | 2    | 0    | 2    | 0    |
|      | AA2   | 15   | 11   | 18   | 9    | 17   | 11    | 12   | 26   | 11   | 15   | 0    | 9    | 6    | 8    |
|      | AA3 1 | 1    | 1    | 1    | 1    | 1    | 1     | 1    | 1    | 1    | 1    | 4    | 1    | 1    | 1    |
|      | AA3 2 | 34   | 32   | 17   | 29   | 23   | 20    | 27   | 17   | 18   | 32   | 23   | 36   | 40   | 34   |
|      | AA3 3 | 3    | 4    | 4    | 3    | 3    | 2     | 4    | 4    | 4    | 6    | 2    | 4    | 7    | 10   |
|      | AA3 4 | 1    | 0    | 0    | 0    | 0    | 2     | 0    | 1    | 1    | 1    | 0    | 0    | 0    | 0    |
|      | AA4   | 0    | 0    | 0    | 0    | 0    | 0     | 0    | 0    | 0    | 0    | 1    | 0    | 0    | 0    |
|      | AA5 1 | 7    | 6    | 3    | 5    | 4    | 7     | 9    | 9    | 9    | 8    | 3    | 16   | 8    | 14   |
|      | AA5 2 | 0    | 0    | 0    | 0    | 0    | 0     | 0    | 0    | 0    | 0    | 3    | 0    | 0    | 0    |
|      | AA6   | 4    | 3    | 0    | 1    | 3    | 1     | 1    | 1    | 2    | 4    | 1    | 2    | 1    | 2    |
|      | AA8   | 2    | 2    | 2    | 2    | 1    | 2     | 2    | 2    | 1    | 2    | 7    | 1    | 2    | 1    |
|      | AA9   | 16   | 11   | 9    | 10   | 13   | 17    | 15   | 18   | 14   | 12   | 10   | 29   | 16   | 31   |
| AA11 | 0     | 0    | 0    | 0    | 0    | 0    | 0     | 0    | 0    | 0    | 2    | 0    | 0    | 0    |      |
| AA12 | 1     | 3    | 0    | 0    | 0    | 0    | 0     | 0    | 1    | 1    | 0    | 1    | 0    | 1    |      |
| AA13 | 0     | 0    | 0    | 0    | 0    | 0    | 0     | 0    | 0    | 0    | 1    | 0    | 0    | 0    |      |

  

| B | Class | P.pl | F.ra | W.co | D.pr | D.qu | L.su | P.pl | N.le | S.la | C.co | G.tr | F.he | F.pi | H.pi | C.pu |
|---|-------|------|------|------|------|------|------|------|------|------|------|------|------|------|------|------|
|   | AA1 1 | 4    | 2    | 3    | 0    | 3    | 3    | 2    | 4    | 4    | 0    | 4    | 3    | 5    | 9    | 6    |
|   | AA1 2 | 1    | 1    | 1    | 2    | 1    | 1    | 1    | 1    | 1    | 2    | 1    | 1    | 1    | 1    | 1    |
|   | AA1 3 | 1    | 1    | 1    | 3    | 1    | 3    | 1    | 0    | 1    | 3    | 0    | 2    | 1    | 1    | 1    |
|   | AA2   | 1    | 1    | 1    | 0    | 1    | 1    | 1    | 0    | 0    | 0    | 0    | 0    | 1    | 0    | 0    |
|   | AA3 1 | 1    | 0    | 0    | 0    | 0    | 0    | 0    | 0    | 2    | 0    | 1    | 3    | 0    | 1    | 2    |
|   | AA3 2 | 15   | 16   | 8    | 6    | 13   | 26   | 24   | 23   | 8    | 13   | 0    | 10   | 16   | 9    | 14   |
|   | AA3 3 | 2    | 6    | 6    | 1    | 4    | 4    | 5    | 3    | 5    | 2    | 2    | 2    | 5    | 4    | 5    |
|   | AA3 4 | 0    | 0    | 0    | 0    | 0    | 0    | 0    | 0    | 2    | 0    | 1    | 0    | 0    | 2    | 0    |
|   | AA4   | 0    | 0    | 0    | 2    | 0    | 0    | 0    | 1    | 0    | 1    | 3    | 0    | 0    | 0    | 0    |
|   | AA5 1 | 2    | 3    | 4    | 3    | 4    | 5    | 3    | 2    | 3    | 3    | 2    | 3    | 4    | 5    | 6    |
|   | AA5 2 | 0    | 0    | 0    | 0    | 0    | 0    | 0    | 0    | 0    | 0    | 0    | 0    | 0    | 0    | 0    |
|   | AA6   | 0    | 1    | 1    | 1    | 1    | 1    | 1    | 3    | 2    | 1    | 3    | 2    | 1    | 2    | 2    |
|   | AA8   | 0    | 0    | 0    | 0    | 0    | 0    | 0    | 0    | 4    | 0    | 0    | 3    | 0    | 4    | 4    |
|   | AA9   | 0    | 2    | 2    | 0    | 4    | 2    | 2    | 4    | 5    | 0    | 4    | 7    | 4    | 15   | 10   |

  

| C    | Class | T.re | R.or | A.we | P.ch | D.es | Hypo | A.ni | Hy.EC38 | N.cr | Hy.CO27 | F.ox | Lecy | B.do |
|------|-------|------|------|------|------|------|------|------|---------|------|---------|------|------|------|
|      | AA1 1 | 5    | 0    | 5    | 6    | 2    | 3    | 4    | 3       | 0    | 3       | 3    | 3    | 5    |
|      | AA1 2 | 2    | 1    | 3    | 2    | 2    | 2    | 3    | 2       | 2    | 2       | 3    | 4    | 3    |
|      | AA1 3 | 1    | 4    | 3    | 1    | 4    | 4    | 7    | 4       | 8    | 4       | 16   | 5    | 13   |
|      | AA2   | 0    | 0    | 1    | 0    | 1    | 2    | 0    | 2       | 0    | 2       | 1    | 2    | 4    |
|      | AA3 1 | 0    | 1    | 2    | 1    | 4    | 4    | 2    | 4       | 2    | 4       | 5    | 2    | 5    |
|      | AA3 2 | 10   | 1    | 26   | 19   | 18   | 23   | 26   | 24      | 3    | 24      | 26   | 11   | 36   |
|      | AA3 3 | 2    | 0    | 1    | 1    | 4    | 6    | 2    | 6       | 1    | 6       | 3    | 2    | 1    |
|      | AA3 4 | 0    | 0    | 0    | 3    | 3    | 2    | 2    | 3       | 1    | 2       | 1    | 2    | 4    |
|      | AA4   | 0    | 0    | 2    | 1    | 3    | 3    | 1    | 3       | 0    | 3       | 1    | 3    | 4    |
|      | AA5 1 | 1    | 2    | 0    | 0    | 1    | 1    | 0    | 1       | 1    | 1       | 1    | 1    | 2    |
|      | AA5 2 | 0    | 0    | 1    | 3    | 0    | 0    | 0    | 0       | 1    | 0       | 4    | 0    | 1    |
|      | AA6   | 1    | 5    | 2    | 1    | 1    | 1    | 1    | 1       | 1    | 1       | 1    | 1    | 1    |
|      | AA8   | 2    | 0    | 4    | 1    | 7    | 6    | 4    | 8       | 7    | 7       | 14   | 8    | 5    |
|      | AA9   | 3    | 0    | 8    | 4    | 30   | 27   | 7    | 27      | 14   | 28      | 16   | 22   | 15   |
| AA10 | 0     | 0    | 0    | 0    | 0    | 0    | 0    | 0    | 0       | 0    | 0       | 0    | 0    |      |
| AA11 | 3     | 0    | 6    | 3    | 4    | 4    | 2    | 4    | 4       | 4    | 4       | 5    | 6    |      |
| AA12 | 1     | 0    | 0    | 0    | 3    | 3    | 0    | 3    | 3       | 3    | 3       | 5    | 0    |      |
| AA13 | 0     | 0    | 0    | 2    | 1    | 1    | 0    | 1    | 1       | 1    | 2       | 1    | 0    |      |

**Figure S3:** Heatmaps showing the genome wide distribution of ligninolytic enzymes (AA- auxiliary activity) in selected popular white rot, brown rot and soft rot fungi

| A | Class | P.ch | P.ca | C.su | H.an | F.me | P.cin | D.sq | T.ve | P.st | P.br | B.ci | P.os | S.hi | P.er |
|---|-------|------|------|------|------|------|-------|------|------|------|------|------|------|------|------|
|   | GH-1  | 2    | 2    | 3    | 2    | 5    | 2     | 4    | 1    | 1    | 2    | 5    | 3    | 3    | 3    |
|   | GH-2  | 2    | 2    | 4    | 3    | 2    | 3     | 4    | 5    | 4    | 2    | 2    | 3    | 3    | 4    |
|   | GH-3  | 10   | 11   | 6    | 11   | 8    | 8     | 8    | 13   | 14   | 8    | 16   | 13   | 17   | 13   |
|   | GH-5  | 19   | 24   | 18   | 16   | 20   | 20    | 19   | 22   | 18   | 23   | 16   | 21   | 20   | 20   |
|   | GH-6  | 1    | 1    | 0    | 1    | 2    | 1     | 1    | 1    | 1    | 1    | 1    | 3    | 1    | 3    |
|   | GH-7  | 8    | 5    | 3    | 1    | 2    | 3     | 4    | 4    | 5    | 4    | 3    | 16   | 3    | 17   |
|   | GH-8  | 0    | 0    | 0    | 0    | 0    | 0     | 0    | 0    | 0    | 0    | 0    | 0    | 0    | 0    |
|   | GH-9  | 1    | 1    | 0    | 1    | 1    | 1     | 0    | 1    | 1    | 1    | 0    | 1    | 1    | 1    |
|   | GH-44 | 0    | 0    | 0    | 0    | 0    | 0     | 1    | 0    | 1    | 2    | 0    | 1    | 1    | 1    |
|   | GH-45 | 2    | 1    | 2    | 2    | 1    | 2     | 1    | 2    | 1    | 3    | 2    | 3    | 1    | 3    |
|   | GH-48 | 0    | 0    | 0    | 0    | 0    | 0     | 0    | 0    | 0    | 0    | 0    | 0    | 0    | 0    |
|   | GH-74 | 4    | 2    | 1    | 1    | 4    | 1     | 1    | 1    | 2    | 1    | 0    | 3    | 2    | 3    |
|   | GH-38 | 1    | 3    | 1    | 1    | 1    | 1     | 1    | 1    | 1    | 1    | 1    | 1    | 1    | 1    |

  

| B | Class | P.pl | F.ra | W.co | D.pr | D.qu | L.su | P.pl | N.le | S.la | C.co | G.tr | F.he | F.pi | H.pi | C.pu |
|---|-------|------|------|------|------|------|------|------|------|------|------|------|------|------|------|------|
|   | GH-1  | 2    | 2    | 1    | 1    | 2    | 2    | 2    | 2    | 3    | 1    | 5    | 1    | 2    | 3    | 3    |
|   | GH-2  | 5    | 3    | 3    | 3    | 3    | 4    | 4    | 3    | 3    | 1    | 4    | 1    | 4    | 3    | 5    |
|   | GH-3  | 8    | 7    | 8    | 9    | 8    | 7    | 6    | 9    | 10   | 11   | 11   | 14   | 11   | 13   | 13   |
|   | GH-5  | 12   | 15   | 18   | 24   | 18   | 20   | 17   | 23   | 21   | 23   | 19   | 15   | 19   | 23   | 21   |
|   | GH-6  | 0    | 0    | 0    | 0    | 0    | 0    | 0    | 0    | 1    | 0    | 0    | 0    | 0    | 1    | 2    |
|   | GH-7  | 0    | 0    | 0    | 0    | 0    | 2    | 0    | 0    | 0    | 0    | 0    | 4    | 0    | 4    | 2    |
|   | GH-8  | 0    | 0    | 0    | 0    | 0    | 0    | 0    | 0    | 0    | 0    | 0    | 0    | 0    | 0    | 0    |
|   | GH-9  | 0    | 0    | 0    | 1    | 0    | 0    | 0    | 1    | 1    | 1    | 1    | 0    | 0    | 1    | 1    |
|   | GH-44 | 0    | 0    | 0    | 0    | 0    | 0    | 0    | 0    | 0    | 0    | 0    | 0    | 0    | 0    | 0    |
|   | GH-45 | 1    | 1    | 0    | 1    | 1    | 2    | 1    | 2    | 0    | 2    | 1    | 2    | 2    | 1    | 1    |
|   | GH-48 | 0    | 0    | 0    | 0    | 0    | 0    | 0    | 0    | 0    | 0    | 0    | 0    | 0    | 0    | 0    |
|   | GH-74 | 0    | 0    | 0    | 0    | 0    | 0    | 0    | 1    | 1    | 0    | 1    | 1    | 0    | 1    | 0    |
|   | GH-38 | 1    | 1    | 1    | 1    | 1    | 1    | 1    | 1    | 1    | 1    | 1    | 1    | 1    | 1    | 1    |

  

| C | Class | T.re | R.or | A.we | P.ch | D.es | Hypo | A.ni | Hy.EC38 | N.cr | Hy.CO27 | F.ox | Lecy | B.do |
|---|-------|------|------|------|------|------|------|------|---------|------|---------|------|------|------|
|   | GH-1  | 2    | 0    | 3    | 3    | 1    | 2    | 3    | 2       | 2    | 2       | 6    | 3    | 6    |
|   | GH-2  | 8    | 0    | 5    | 7    | 9    | 8    | 6    | 10      | 6    | 10      | 9    | 6    | 5    |
|   | GH-3  | 13   | 6    | 16   | 16   | 18   | 21   | 19   | 22      | 11   | 21      | 33   | 17   | 22   |
|   | GH-5  | 8    | 7    | 11   | 14   | 15   | 15   | 10   | 18      | 6    | 17      | 21   | 19   | 19   |
|   | GH-6  | 1    | 0    | 1    | 1    | 3    | 2    | 2    | 2       | 3    | 2       | 1    | 3    | 1    |
|   | GH-7  | 2    | 0    | 3    | 2    | 5    | 4    | 2    | 5       | 5    | 5       | 3    | 9    | 2    |
|   | GH-8  | 0    | 1    | 0    | 0    | 0    | 0    | 0    | 0       | 0    | 0       | 0    | 0    | 0    |
|   | GH-9  | 0    | 5    | 0    | 0    | 0    | 0    | 0    | 0       | 0    | 0       | 0    | 0    | 0    |
|   | GH-44 | 0    | 0    | 0    | 0    | 0    | 0    | 0    | 0       | 0    | 0       | 0    | 0    | 0    |
|   | GH-45 | 1    | 5    | 0    | 0    | 1    | 1    | 0    | 1       | 1    | 1       | 1    | 4    | 4    |
|   | GH-48 | 0    | 0    | 0    | 0    | 0    | 0    | 0    | 0       | 0    | 0       | 0    | 0    | 0    |
|   | GH-74 | 1    | 0    | 0    | 0    | 1    | 1    | 1    | 1       | 1    | 1       | 1    | 1    | 0    |
|   | GH-38 | 1    | 2    | 1    | 1    | 1    | 1    | 1    | 1       | 1    | 1       | 1    | 1    | 1    |

**Figure S4:** Heatmaps showing the genome wide distribution of cellulolytic enzymes (GH-glycosidic hydrolases) in selected popular white rot, brown rot and soft rot fungi.



| A | Class | P.ch  | P.ca | C.su | H.an | F.me | P.cin | D.sq | T.ve | P.st | P.br | B.ci | P.os | S.hi | P.er |
|---|-------|-------|------|------|------|------|-------|------|------|------|------|------|------|------|------|
|   |       | GH-10 | 6    | 5    | 6    | 2    | 4     | 6    | 5    | 6    | 5    | 8    | 2    | 3    | 6    |
|   | GH-11 | 1     | 1    | 1    | 0    | 0    | 0     | 0    | 0    | 1    | 0    | 2    | 2    | 1    | 2    |
|   | GH-39 | 0     | 0    | 0    | 0    | 0    | 0     | 0    | 0    | 0    | 0    | 1    | 0    | 0    | 0    |
|   | GH-12 | 2     | 3    | 2    | 4    | 3    | 3     | 3    | 5    | 2    | 2    | 4    | 2    | 5    | 2    |
|   | GH-43 | 4     | 4    | 2    | 4    | 7    | 3     | 7    | 3    | 7    | 2    | 6    | 8    | 12   | 7    |
|   | GH-47 | 5     | 5    | 4    | 6    | 5    | 5     | 5    | 5    | 5    | 9    | 9    | 9    | 6    | 10   |
|   | GH-27 | 3     | 3    | 4    | 4    | 4    | 2     | 6    | 4    | 5    | 2    | 4    | 7    | 5    | 8    |
|   | GH-31 | 6     | 8    | 5    | 9    | 5    | 5     | 6    | 5    | 8    | 5    | 5    | 8    | 8    | 5    |
|   | GH-35 | 3     | 4    | 1    | 4    | 2    | 2     | 3    | 2    | 4    | 4    | 4    | 4    | 7    | 4    |
|   | GH-78 | 1     | 1    | 1    | 2    | 2    | 2     | 5    | 3    | 7    | 1    | 7    | 2    | 3    | 4    |
|   | CE-1  | 4     | 2    | 2    | 1    | 0    | 3     | 0    | 3    | 2    | 1    | 2    | 2    | 1    | 2    |
|   | CE-2  | 0     | 0    | 0    | 0    | 0    | 0     | 0    | 0    | 0    | 0    | 0    | 0    | 0    | 0    |
|   | CE-3  | 0     | 0    | 0    | 0    | 0    | 0     | 0    | 0    | 0    | 0    | 1    | 0    | 0    | 0    |
|   | CE-4  | 4     | 2    | 3    | 5    | 4    | 3     | 2    | 3    | 5    | 2    | 5    | 11   | 7    | 10   |
|   | CE-5  | 0     | 0    | 0    | 0    | 0    | 0     | 0    | 0    | 1    | 1    | 11   | 0    | 1    | 0    |
|   | CE-6  | 0     | 0    | 0    | 0    | 0    | 0     | 0    | 0    | 0    | 0    | 0    | 0    | 0    | 0    |
|   | CE-7  | 0     | 0    | 0    | 0    | 0    | 0     | 0    | 0    | 0    | 0    | 0    | 0    | 0    | 0    |

  

| B | Class | P.pl  | F.ra | W.co | D.pr | D.qu | L.su | P.pl | N.le | S.la | C.co | G.tr | F.he | F.pi | H.pi | C.pu |
|---|-------|-------|------|------|------|------|------|------|------|------|------|------|------|------|------|------|
|   |       | GH-10 | 1    | 3    | 4    | 3    | 4    | 3    | 3    | 2    | 1    | 2    | 3    | 2    | 3    | 3    |
|   | GH-11 | 0     | 0    | 0    | 0    | 0    | 0    | 0    | 0    | 0    | 2    | 0    | 0    | 0    | 0    | 0    |
|   | GH-39 | 0     | 0    | 0    | 0    | 0    | 0    | 0    | 0    | 0    | 0    | 0    | 0    | 0    | 0    | 0    |
|   | GH-12 | 2     | 2    | 2    | 1    | 2    | 2    | 2    | 2    | 2    | 1    | 2    | 2    | 2    | 3    | 4    |
|   | GH-43 | 0     | 3    | 1    | 5    | 4    | 1    | 1    | 5    | 2    | 4    | 6    | 2    | 7    | 3    | 6    |
|   | GH-47 | 7     | 6    | 5    | 4    | 5    | 5    | 5    | 4    | 6    | 4    | 4    | 7    | 6    | 5    | 9    |
|   | GH-27 | 2     | 3    | 3    | 2    | 4    | 3    | 3    | 3    | 3    | 2    | 3    | 4    | 4    | 6    | 4    |
|   | GH-31 | 6     | 6    | 5    | 6    | 4    | 4    | 4    | 5    | 5    | 8    | 5    | 6    | 5    | 6    | 12   |
|   | GH-35 | 2     | 1    | 2    | 1    | 1    | 1    | 1    | 2    | 3    | 1    | 2    | 3    | 2    | 2    | 2    |
|   | GH-78 | 1     | 3    | 3    | 0    | 3    | 3    | 3    | 1    | 2    | 0    | 2    | 5    | 4    | 2    | 2    |
|   | CE-1  | 0     | 0    | 0    | 0    | 1    | 2    | 0    | 0    | 0    | 0    | 1    | 0    | 0    | 2    | 0    |
|   | CE-2  | 0     | 0    | 0    | 0    | 0    | 0    | 0    | 0    | 0    | 0    | 0    | 0    | 0    | 0    | 0    |
|   | CE-3  | 0     | 0    | 0    | 0    | 0    | 0    | 0    | 0    | 0    | 0    | 0    | 0    | 0    | 0    | 0    |
|   | CE-4  | 2     | 3    | 4    | 11   | 3    | 3    | 3    | 5    | 6    | 7    | 5    | 4    | 3    | 3    | 9    |
|   | CE-5  | 0     | 0    | 0    | 0    | 0    | 0    | 0    | 0    | 0    | 0    | 0    | 0    | 0    | 0    | 1    |
|   | CE-6  | 0     | 0    | 0    | 0    | 0    | 0    | 0    | 0    | 0    | 0    | 0    | 0    | 0    | 0    | 0    |
|   | CE-7  | 0     | 0    | 0    | 0    | 0    | 0    | 0    | 0    | 0    | 0    | 0    | 0    | 0    | 0    | 0    |

  

| C | Class | T.re  | R.or | A.we | P.ch | D.es | Hypo | A.ni | Hy.EC38 | N.cr | Hy.CO27 | F.ox | Lecy | B.do |
|---|-------|-------|------|------|------|------|------|------|---------|------|---------|------|------|------|
|   |       | GH-10 | 1    | 0    | 4    | 3    | 3    | 2    | 2       | 3    | 4       | 3    | 5    | 6    |
|   | GH-11 | 3     | 0    | 1    | 1    | 3    | 2    | 3    | 2       | 2    | 2       | 3    | 5    | 1    |
|   | GH-39 | 1     | 0    | 0    | 2    | 0    | 0    | 0    | 0       | 0    | 0       | 4    | 0    | 2    |
|   | GH-12 | 2     | 0    | 3    | 4    | 0    | 1    | 4    | 0       | 2    | 0       | 4    | 2    | 4    |
|   | GH-43 | 2     | 2    | 14   | 13   | 20   | 19   | 11   | 21      | 7    | 22      | 35   | 19   | 23   |
|   | GH-47 | 8     | 11   | 6    | 5    | 9    | 7    | 6    | 9       | 9    | 9       | 10   | 11   | 11   |
|   | GH-27 | 8     | 2    | 2    | 2    | 3    | 1    | 5    | 3       | 0    | 2       | 4    | 3    | 7    |
|   | GH-31 | 4     | 3    | 10   | 12   | 5    | 6    | 7    | 6       | 6    | 6       | 10   | 14   | 11   |
|   | GH-35 | 1     | 1    | 4    | 4    | 5    | 5    | 5    | 4       | 2    | 4       | 7    | 3    | 4    |
|   | GH-78 | 1     | 0    | 5    | 5    | 2    | 3    | 9    | 3       | 2    | 3       | 18   | 5    | 8    |
|   | CE-1  | 2     | 0    | 2    | 2    | 7    | 7    | 2    | 8       | 6    | 8       | 7    | 9    | 4    |
|   | CE-2  | 0     | 0    | 0    | 0    | 0    | 0    | 0    | 0       | 0    | 0       | 1    | 0    | 0    |
|   | CE-3  | 3     | 0    | 2    | 3    | 9    | 9    | 0    | 8       | 3    | 8       | 6    | 4    | 0    |
|   | CE-4  | 3     | 35   | 5    | 4    | 6    | 6    | 4    | 6       | 5    | 6       | 9    | 6    | 7    |
|   | CE-5  | 4     | 0    | 8    | 4    | 6    | 5    | 5    | 7       | 3    | 7       | 12   | 8    | 16   |
|   | CE-6  | 0     | 0    | 0    | 0    | 0    | 0    | 0    | 0       | 0    | 0       | 0    | 0    | 0    |
|   | CE-7  | 0     | 0    | 0    | 0    | 0    | 0    | 0    | 0       | 0    | 0       | 0    | 0    | 0    |

**Figure S5:** Heatmaps showing the genome wide distribution of hemicellulolytic enzymes (GH-glycosidic hydrolases and CE-Carbohydrate esterases) in selected popular white rot, brown rot and soft rot fungi

| A     | Class  | P.ch | P.ca | C.su | H.an | F.me | P.cin | D.sq | T.ve | P.st | P.br | B.ci | P.os | S.hi | P.er |
|-------|--------|------|------|------|------|------|-------|------|------|------|------|------|------|------|------|
|       | PL-1   | 0    | 0    | 0    | 2    | 2    | 0     | 0    | 0    | 4    | 0    | 7    | 10   | 4    | 19   |
|       | PL-3   | 0    | 0    | 0    | 0    | 0    | 0     | 0    | 0    | 0    | 0    | 2    | 3    | 0    | 3    |
|       | PL-4   | 0    | 0    | 0    | 1    | 0    | 1     | 1    | 1    | 3    | 1    | 0    | 2    | 3    | 2    |
|       | PL-9   | 0    | 0    | 0    | 0    | 0    | 0     | 0    | 0    | 0    | 0    | 0    | 0    | 0    | 0    |
|       | GH-28  | 5    | 4    | 6    | 8    | 17   | 7     | 7    | 11   | 13   | 5    | 19   | 6    | 17   | 8    |
|       | GH-78  | 1    | 1    | 1    | 2    | 2    | 2     | 5    | 3    | 7    | 1    | 7    | 2    | 3    | 4    |
|       | GH-88  | 1    | 1    | 1    | 1    | 2    | 2     | 1    | 1    | 1    | 1    | 1    | 1    | 1    | 2    |
|       | GH-95  | 1    | 1    | 1    | 1    | 2    | 1     | 1    | 1    | 1    | 3    | 2    | 1    | 1    | 1    |
|       | GH-105 | 0    | 0    | 0    | 2    | 1    | 0     | 1    | 0    | 2    | 0    | 2    | 2    | 2    | 2    |
|       | GH-115 | 1    | 1    | 2    | 1    | 3    | 2     | 2    | 2    | 1    | 2    | 1    | 1    | 2    | 1    |
| CE-8  | 2      | 2    | 2    | 3    | 3    | 2    | 3     | 2    | 6    | 3    | 5    | 2    | 5    | 2    |      |
| CE-12 | 0      | 0    | 0    | 2    | 2    | 2    | 2     | 0    | 1    | 0    | 3    | 2    | 3    | 2    |      |

  

| B     | Class  | P.pl | F.ra | W.co | D.pr | D.qu | L.su | P.pl | N.le | S.la | C.co | G.tr | F.he | F.pi | H.pi | C.pu |   |
|-------|--------|------|------|------|------|------|------|------|------|------|------|------|------|------|------|------|---|
|       | PL-1   | 0    | 0    | 0    | 0    | 0    | 0    | 0    | 0    | 0    | 0    | 0    | 0    | 1    | 0    | 0    | 0 |
|       | PL-3   | 0    | 0    | 0    | 0    | 0    | 0    | 0    | 0    | 0    | 0    | 0    | 0    | 0    | 0    | 0    | 0 |
|       | PL-4   | 0    | 0    | 0    | 0    | 0    | 0    | 0    | 0    | 0    | 0    | 2    | 1    | 0    | 0    | 0    |   |
|       | PL-9   | 0    | 0    | 0    | 0    | 0    | 0    | 0    | 0    | 0    | 0    | 0    | 0    | 0    | 0    | 0    |   |
|       | GH-28  | 7    | 9    | 9    | 6    | 9    | 8    | 8    | 10   | 7    | 7    | 10   | 6    | 12   | 9    | 13   |   |
|       | GH-78  | 1    | 3    | 3    | 0    | 3    | 3    | 3    | 1    | 2    | 0    | 2    | 5    | 4    | 2    | 2    |   |
|       | GH-88  | 1    | 1    | 1    | 1    | 1    | 1    | 1    | 1    | 1    | 1    | 1    | 1    | 1    | 1    | 1    |   |
|       | GH-95  | 1    | 1    | 1    | 0    | 1    | 1    | 1    | 1    | 1    | 0    | 1    | 1    | 1    | 1    | 1    |   |
|       | GH-105 | 0    | 0    | 0    | 0    | 0    | 0    | 0    | 2    | 0    | 1    | 2    | 3    | 1    | 0    | 0    |   |
|       | GH-115 | 0    | 2    | 2    | 2    | 1    | 3    | 1    | 1    | 1    | 2    | 2    | 4    | 1    | 1    | 2    |   |
| CE-8  | 4      | 2    | 1    | 3    | 1    | 1    | 2    | 2    | 2    | 2    | 2    | 2    | 2    | 2    | 2    |      |   |
| CE-12 | 0      | 0    | 0    | 0    | 0    | 0    | 0    | 0    | 0    | 0    | 0    | 0    | 0    | 0    | 0    |      |   |

  

| C     | Class  | T.re | R.or | A.we | P.ch | D.es | Hypo | A.ni | Hy.EC38 | N.cr | Hy.CO27 | F.ox | Lecy | B.do |
|-------|--------|------|------|------|------|------|------|------|---------|------|---------|------|------|------|
|       | PL-1   | 0    | 0    | 5    | 5    | 2    | 3    | 7    | 2       | 1    | 2       | 10   | 2    | 8    |
|       | PL-3   | 0    | 0    | 2    | 1    | 0    | 1    | 0    | 1       | 1    | 1       | 7    | 1    | 9    |
|       | PL-4   | 0    | 0    | 3    | 3    | 5    | 5    | 2    | 5       | 1    | 5       | 3    | 3    | 5    |
|       | PL-9   | 0    | 0    | 0    | 0    | 0    | 0    | 0    | 0       | 0    | 0       | 2    | 0    | 1    |
|       | GH-28  | 4    | 18   | 12   | 5    | 3    | 4    | 21   | 3       | 2    | 3       | 15   | 6    | 10   |
|       | GH-78  | 1    | 0    | 5    | 5    | 2    | 3    | 9    | 3       | 2    | 3       | 18   | 5    | 8    |
|       | GH-88  | 0    | 0    | 0    | 0    | 1    | 0    | 1    | 0       | 0    | 0       | 3    | 1    | 1    |
|       | GH-95  | 4    | 0    | 1    | 1    | 0    | 0    | 2    | 0       | 0    | 0       | 2    | 1    | 3    |
|       | GH-105 | 1    | 0    | 2    | 2    | 3    | 4    | 2    | 3       | 2    | 3       | 4    | 2    | 4    |
|       | GH-115 | 1    | 0    | 1    | 0    | 1    | 1    | 0    | 1       | 1    | 1       | 3    | 3    | 2    |
| CE-8  | 0      | 6    | 2    | 2    | 1    | 1    | 3    | 2    | 2       | 2    | 8       | 3    | 3    |      |
| CE-12 | 0      | 0    | 2    | 2    | 2    | 2    | 2    | 2    | 1       | 2    | 4       | 3    | 4    |      |

**Figure S6:** Heatmaps showing the genome wide distribution of pectinolytic enzymes (GH-glycosidic hydrolases, PL-polysaccharide lyases and CE-Carbohydrate esterases) in selected popular white rot, brown rot and soft rot fungi
